# Supplementary material for: Assessing Temporal Trade-Offs of Ecosystem Services by Production Possibility Frontiers
Source: MDPI journal article supplement (doi:10.3390/rs15030749), 2023-01-28

## S1. Spatial distributions of water yield from 1990 to 2020

a. Water yield 1990

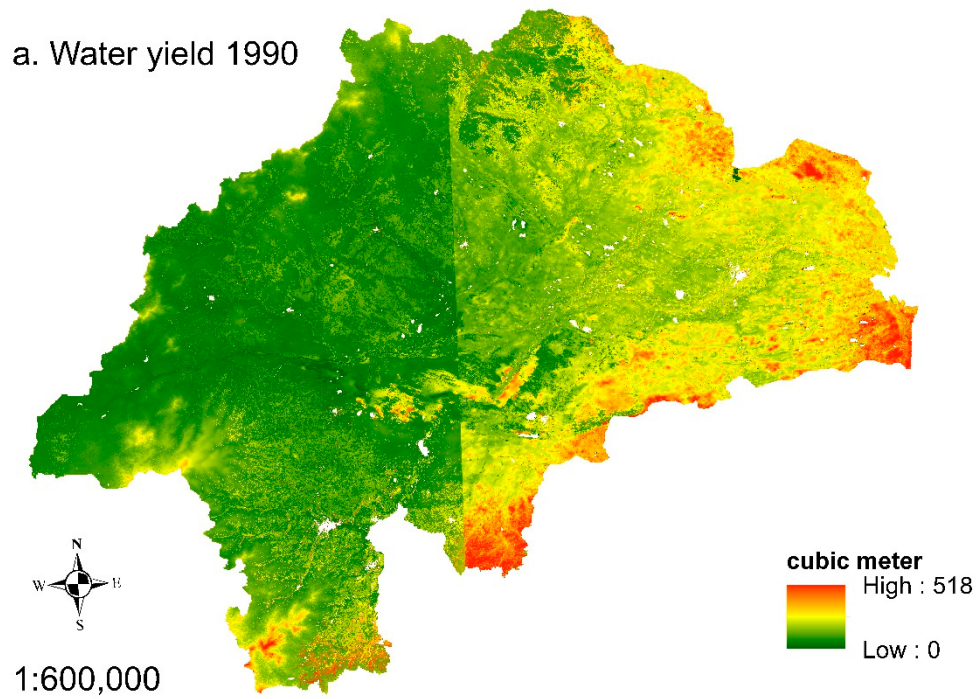

b. Water yield 1995

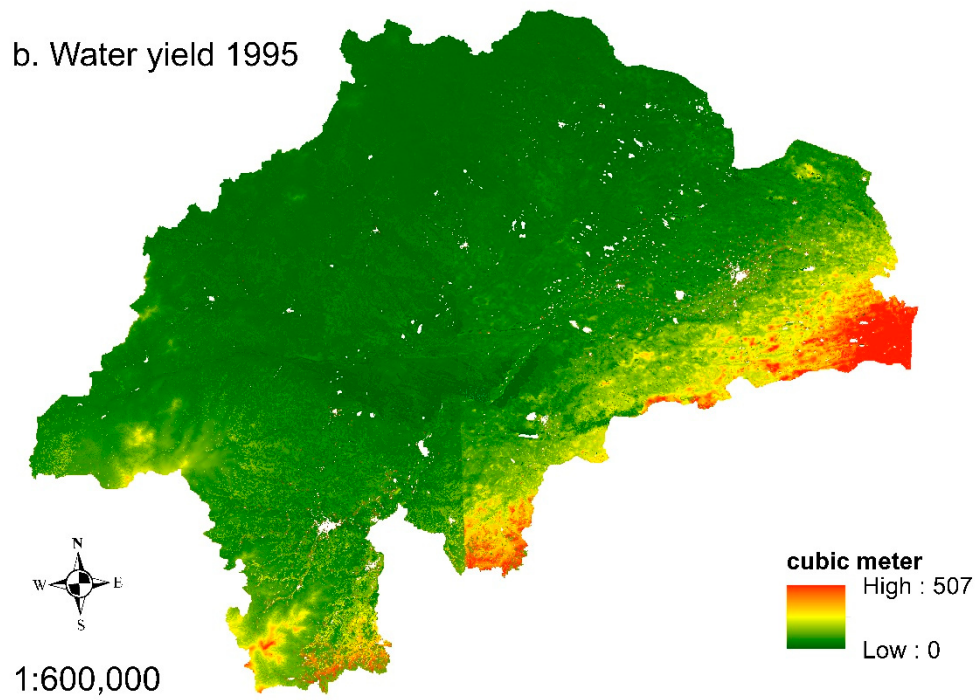

c. Water yield 2000

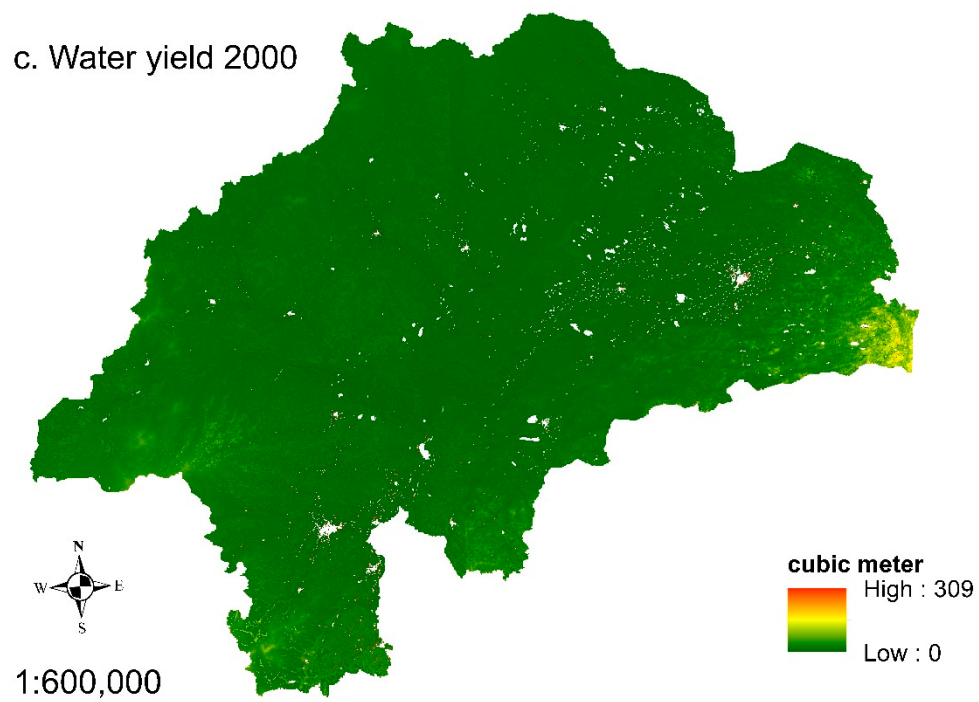

d. Water yield 2005

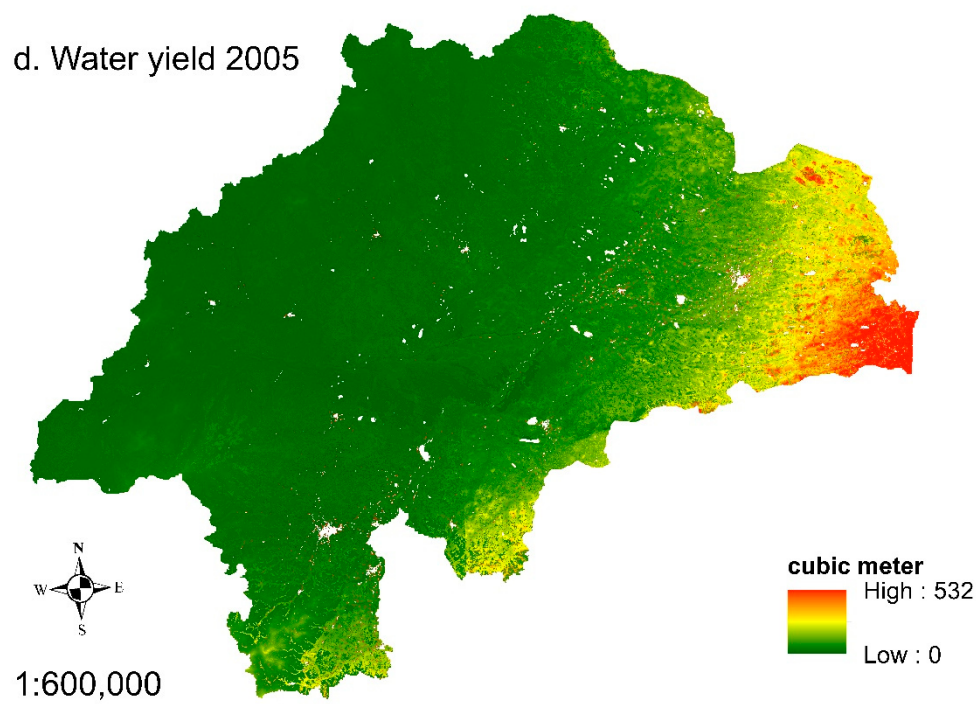

e. Water yield 2010

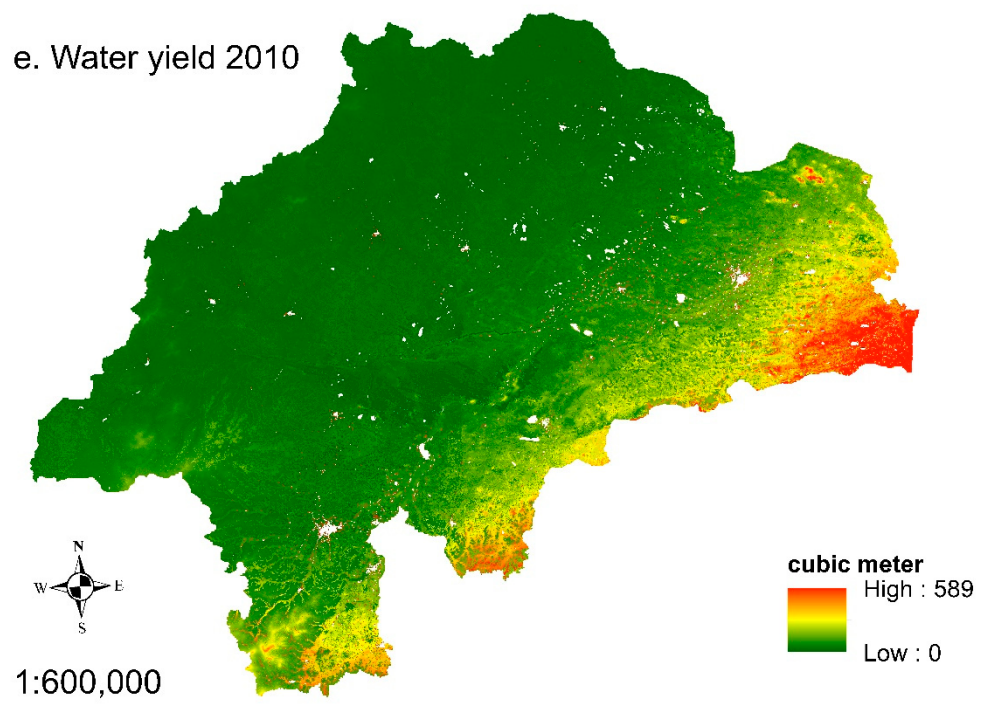

f. Water yield 2015

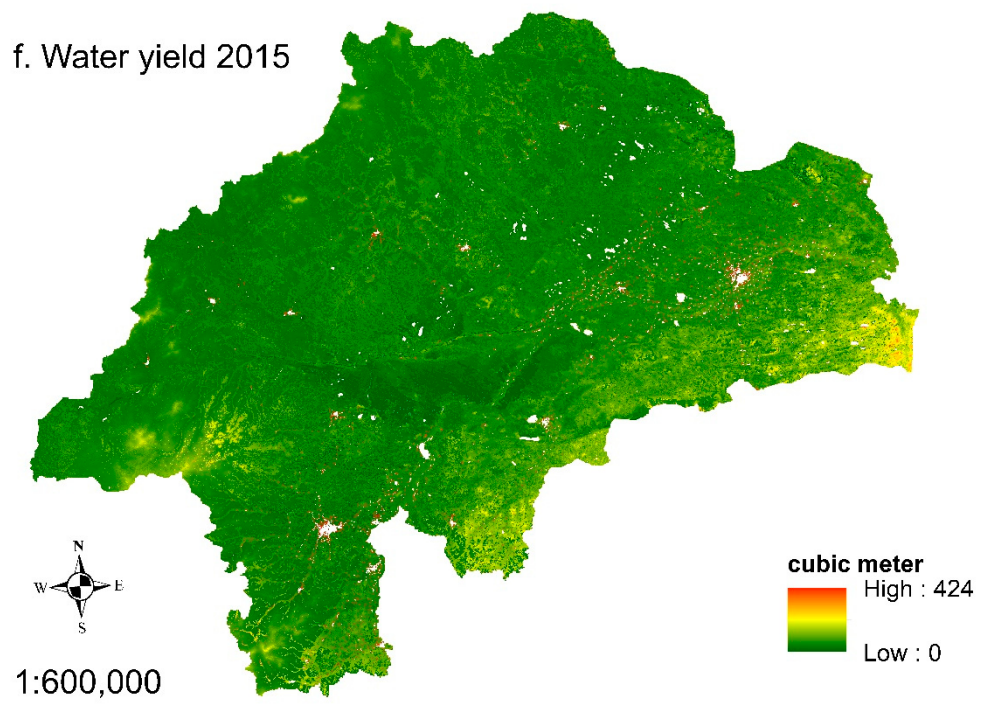

g. Water yield 2020

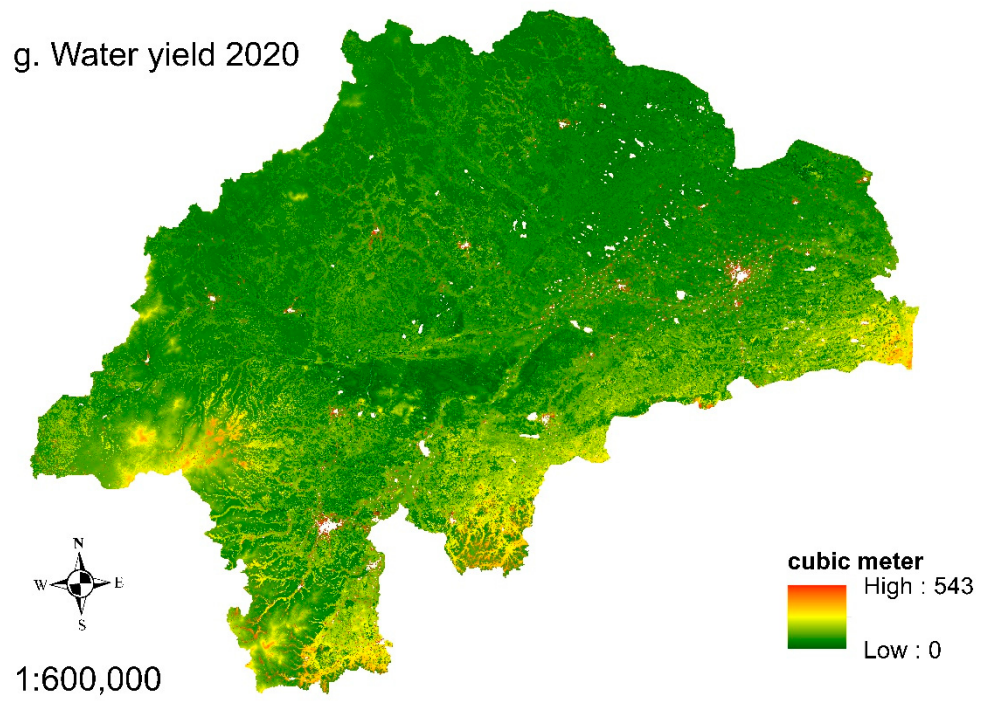

## S2. Spatial distributions of soil deposition from 1990 to 2020

a. Soil deposition 1990

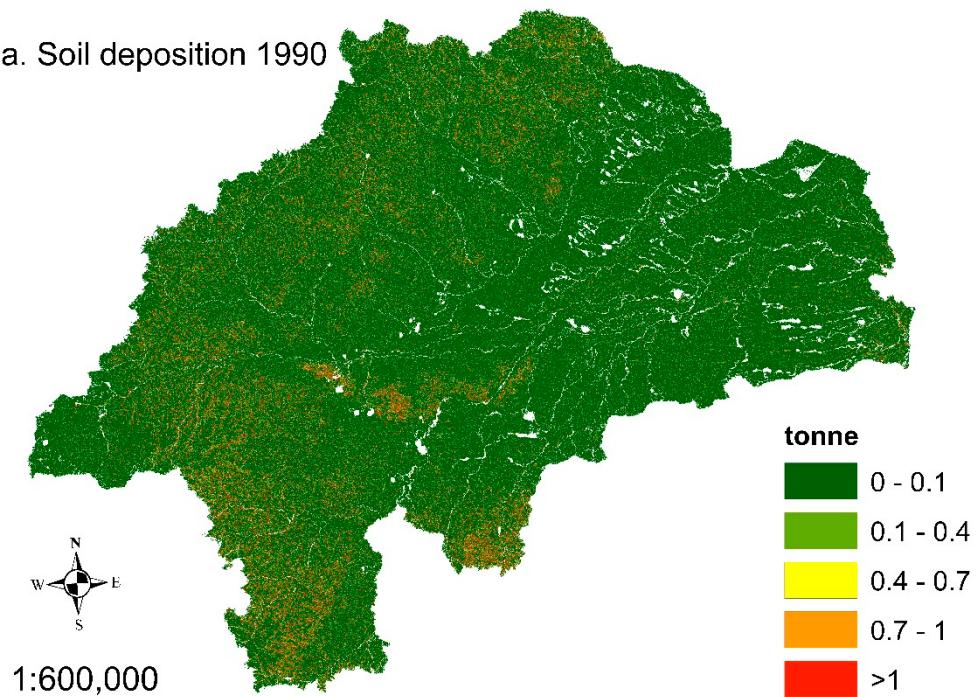

b. Soil deposition 1995

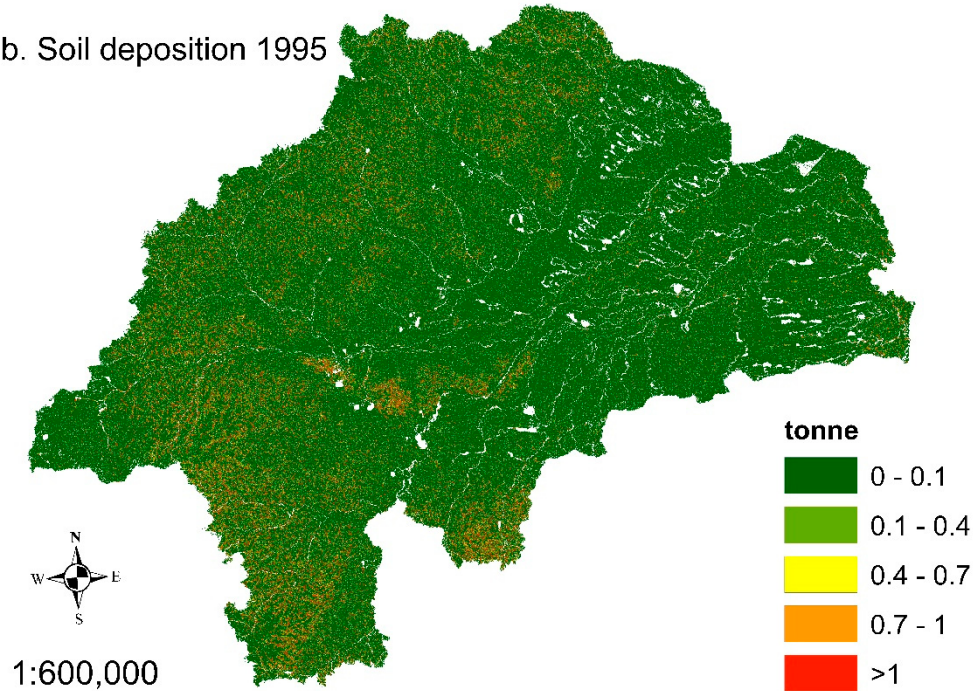

c. Soil deposition 2000

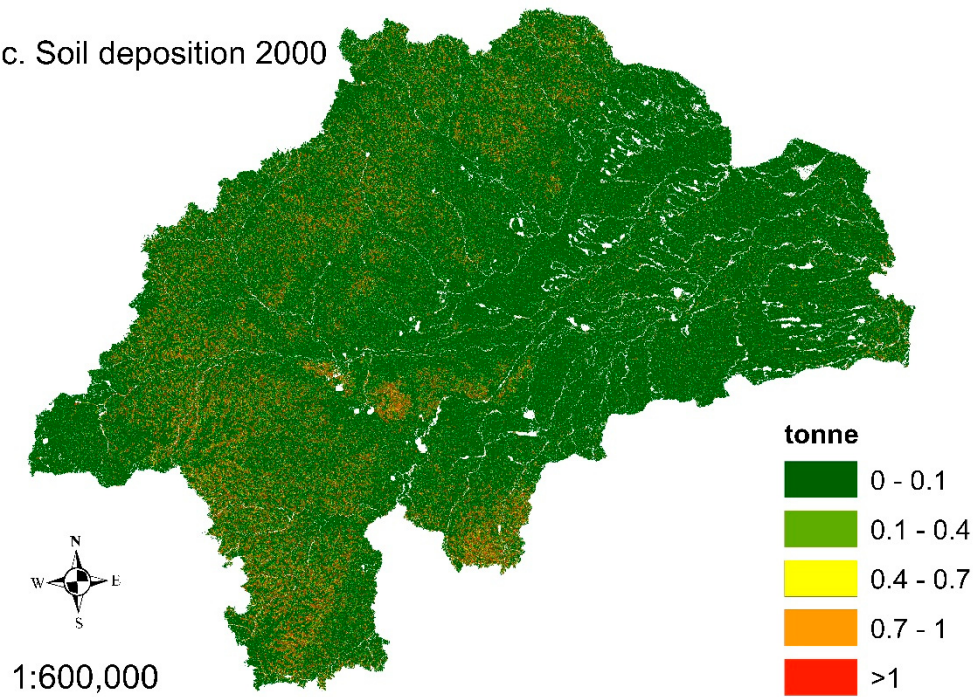

d. Soil deposition 2005

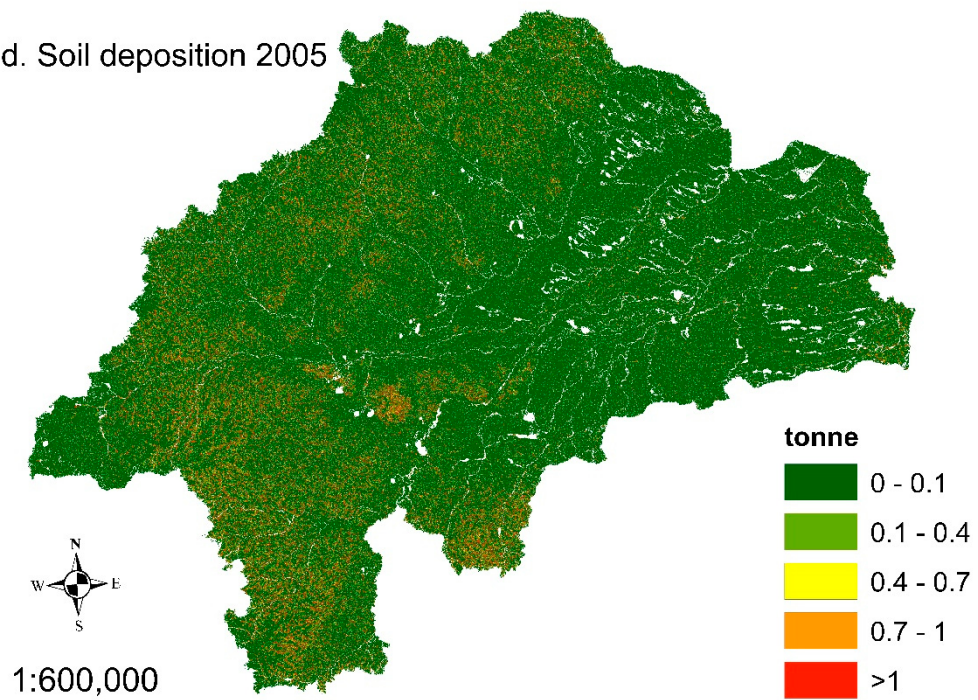

e. Soil deposition 2010

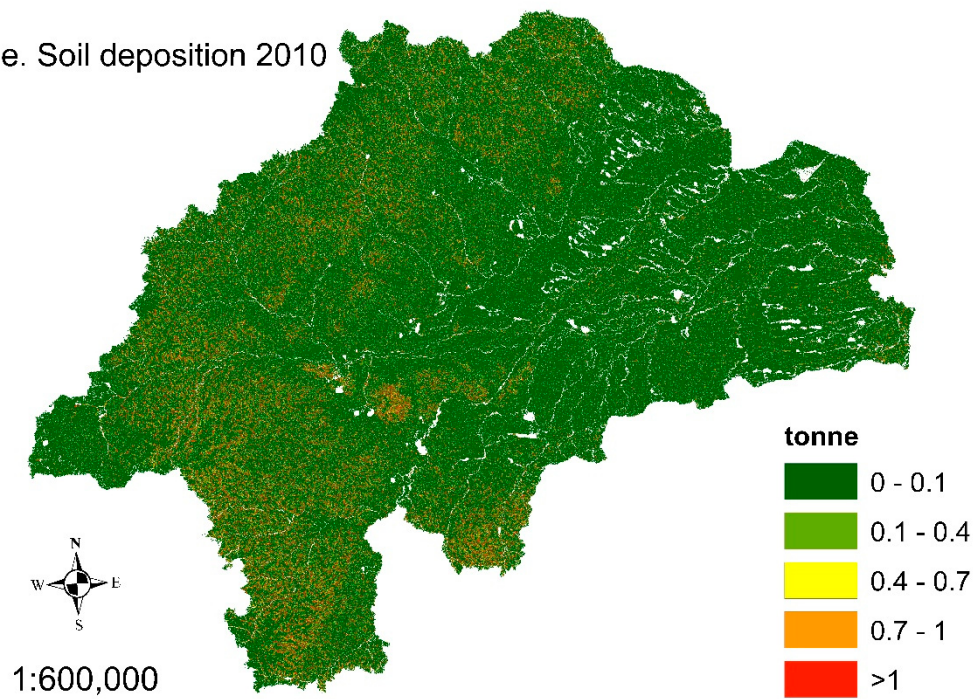

f. Soil deposition 2015

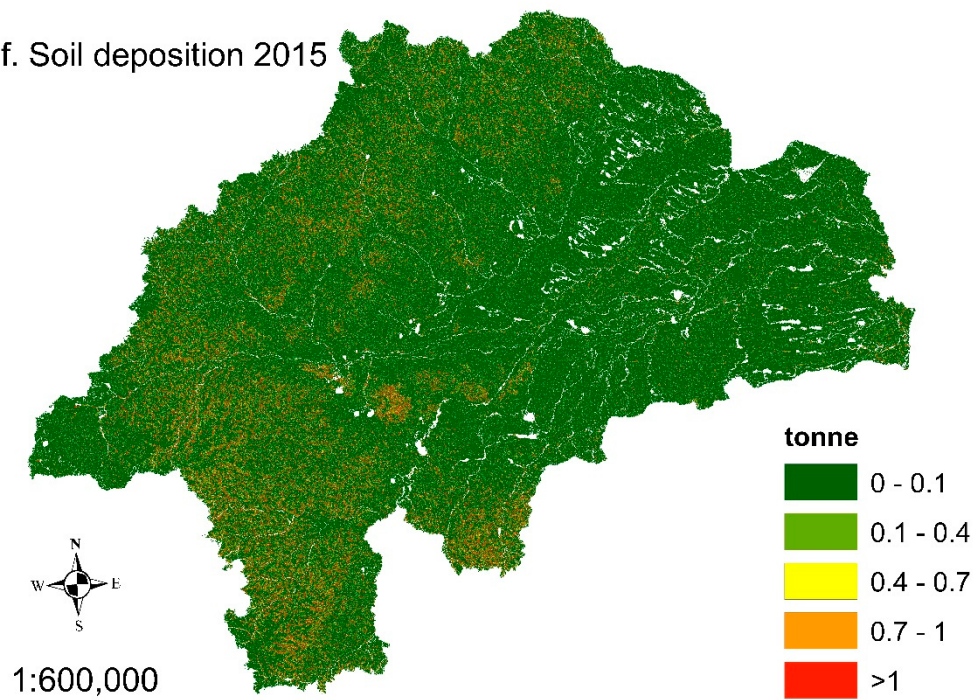

g. Soil deposition 2020

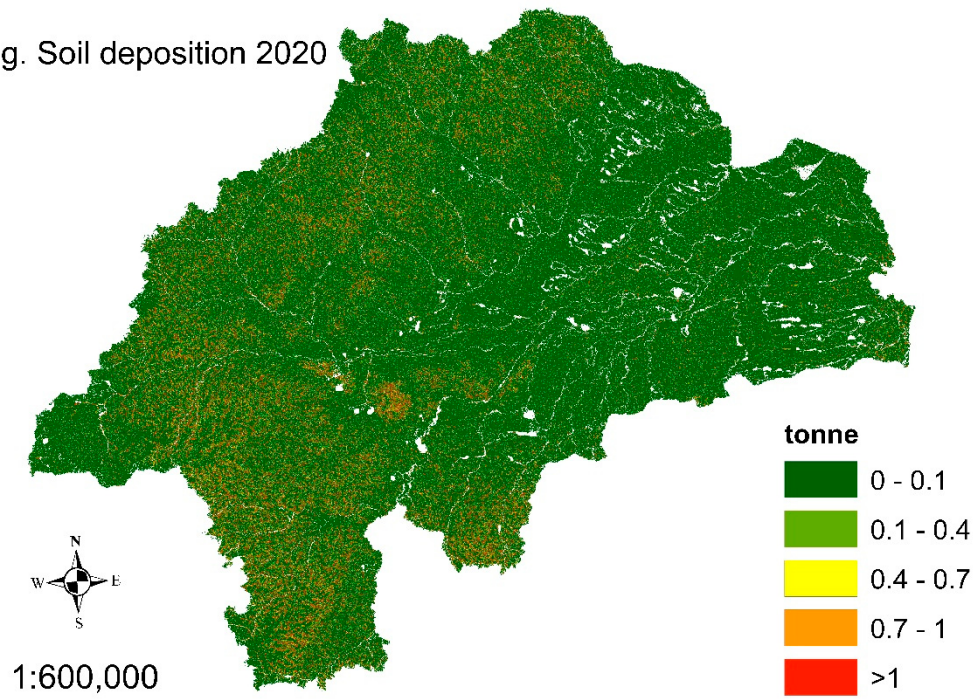

**S3. Spatial distributions of carbon storage from 1990 to 2020**

a. Carbon storage 1990

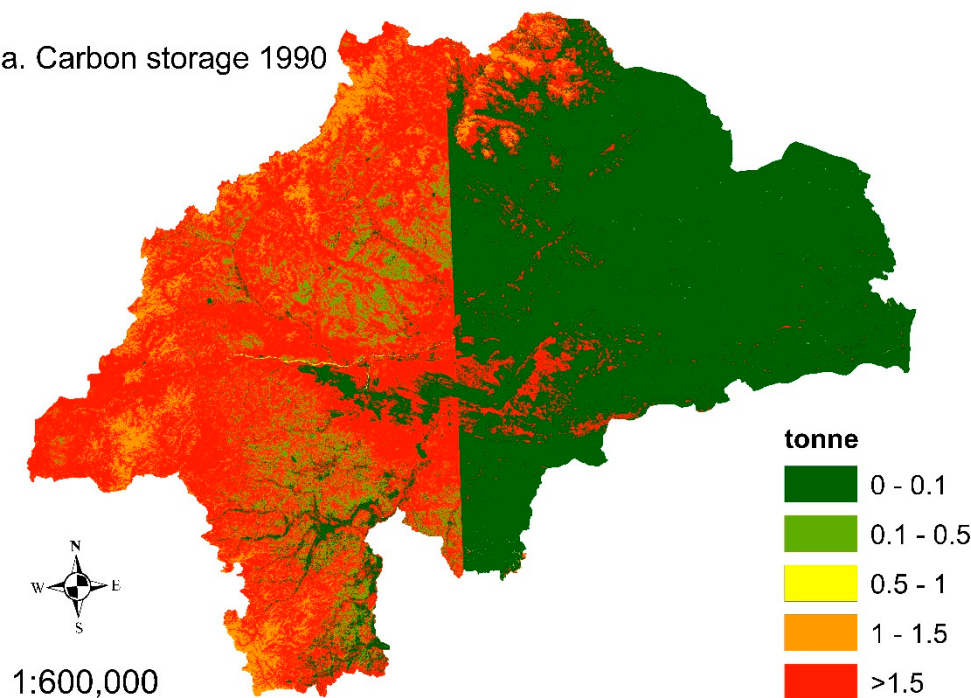

b. Carbon storage 1995

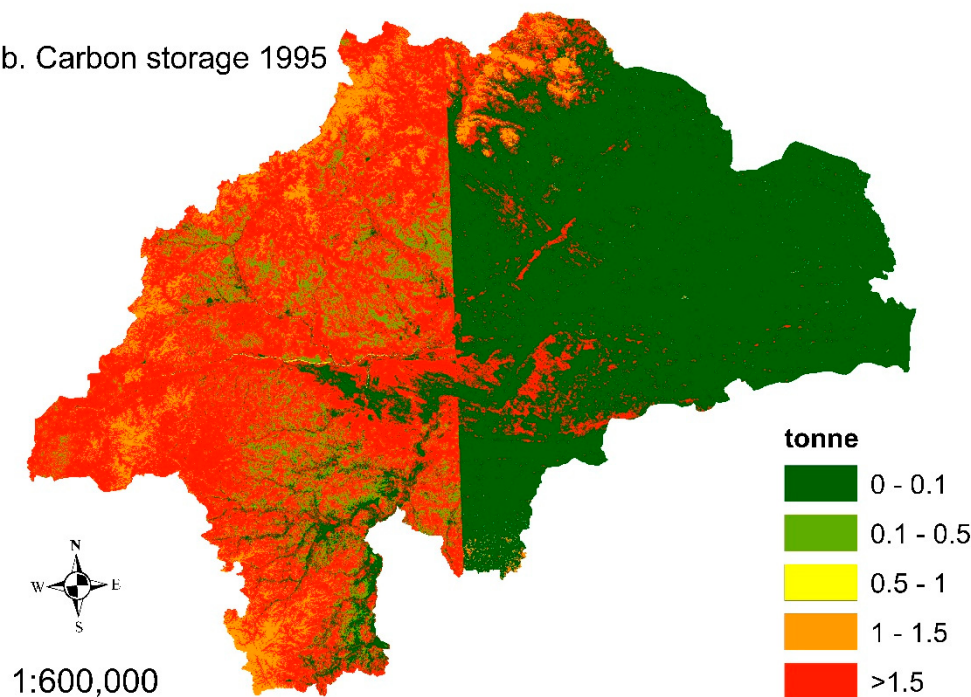

c. Carbon storage 2000

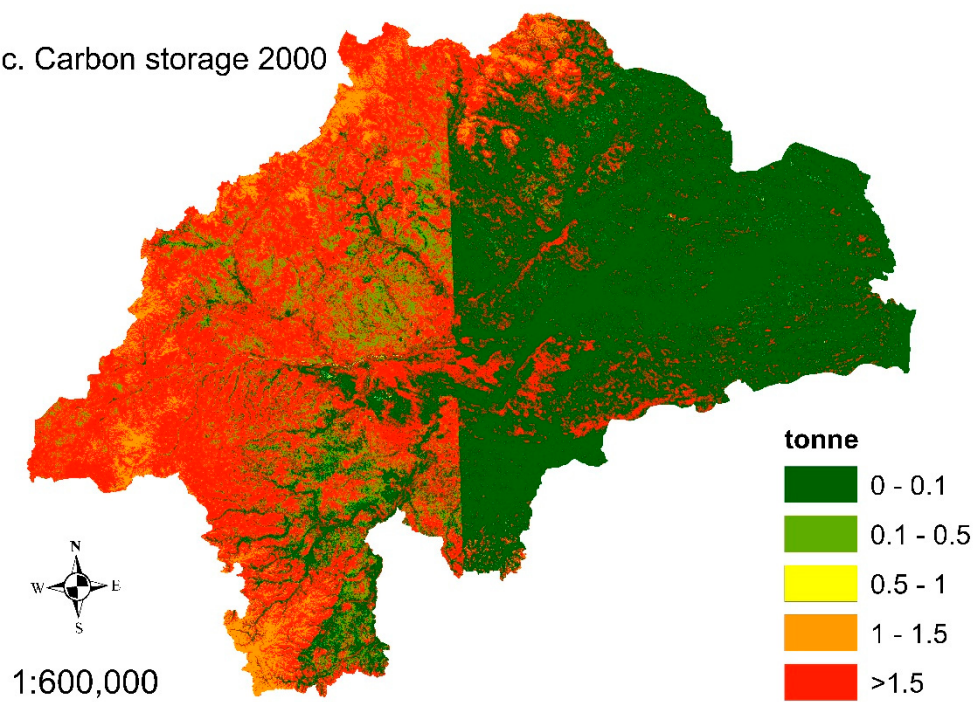

d. Carbon storage 2005

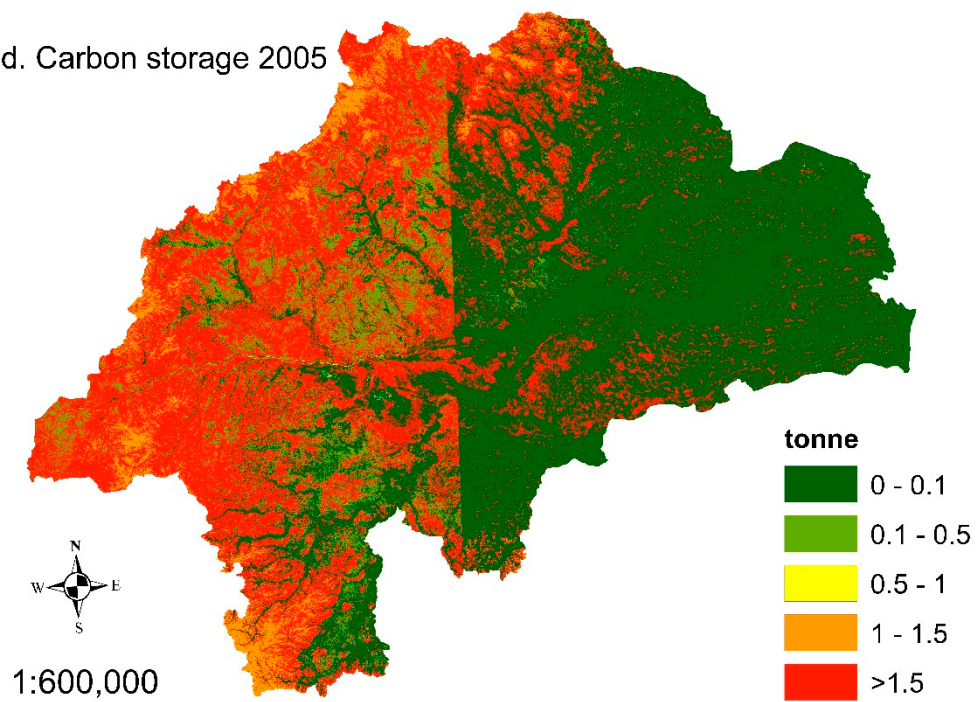

e. Carbon storage 2010

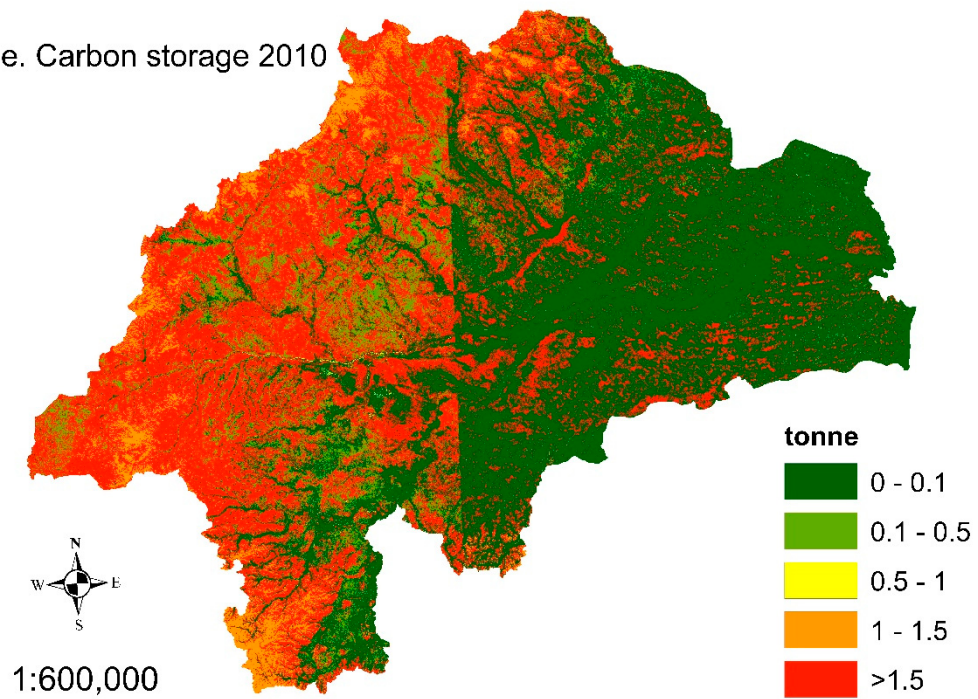

f. Carbon storage 2015

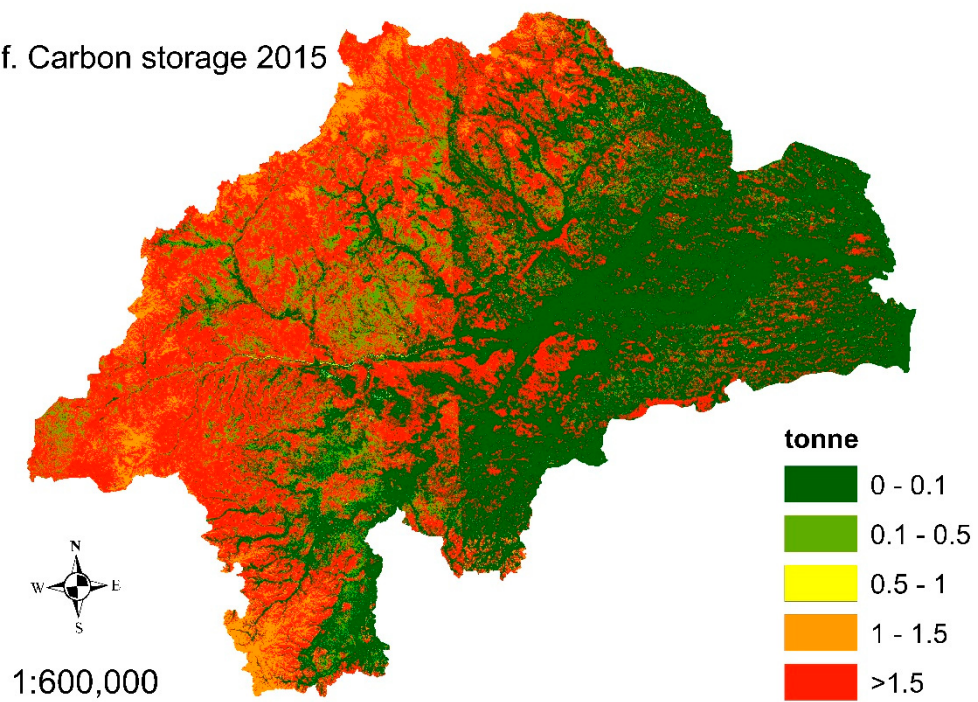

g. Carbon storage 2020

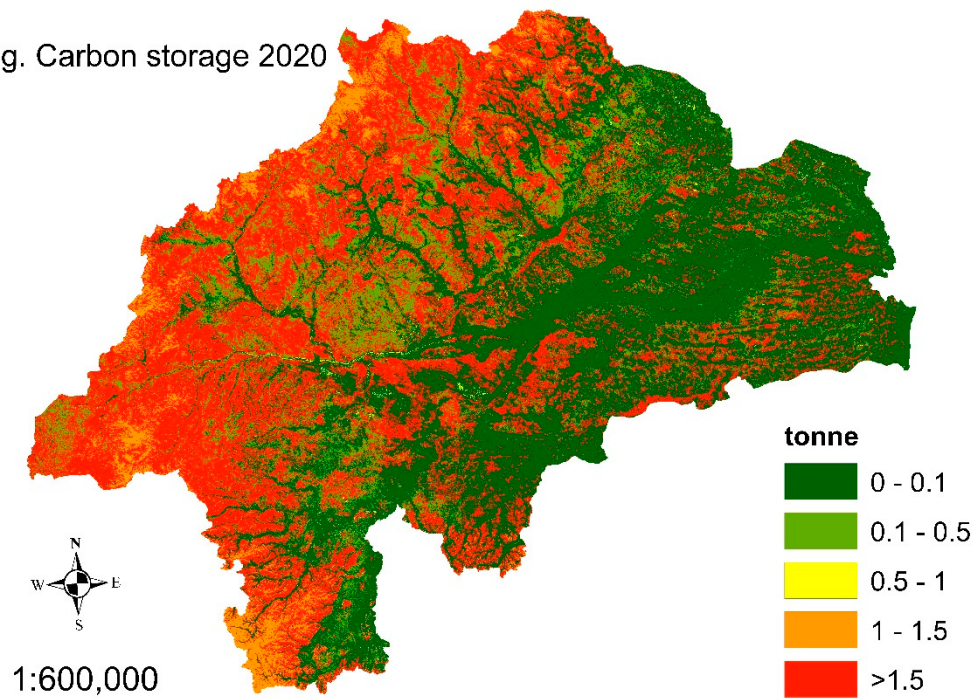

#### S4. Spatial distributions of habitat quality from 1990 to 2020

a. Habitat quality 1990

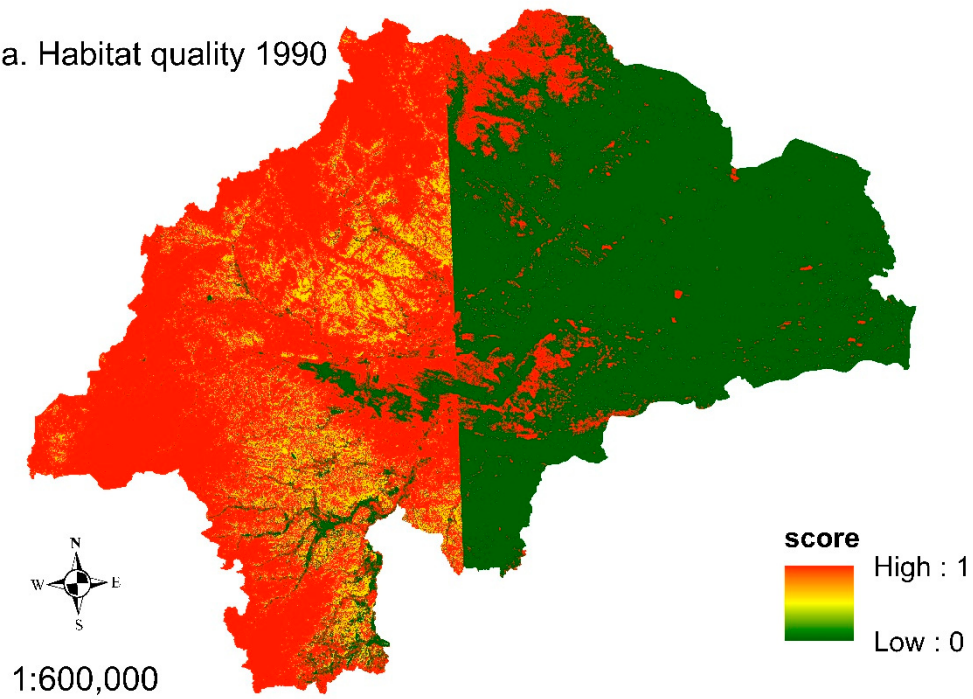

b. Habitat quality 1995

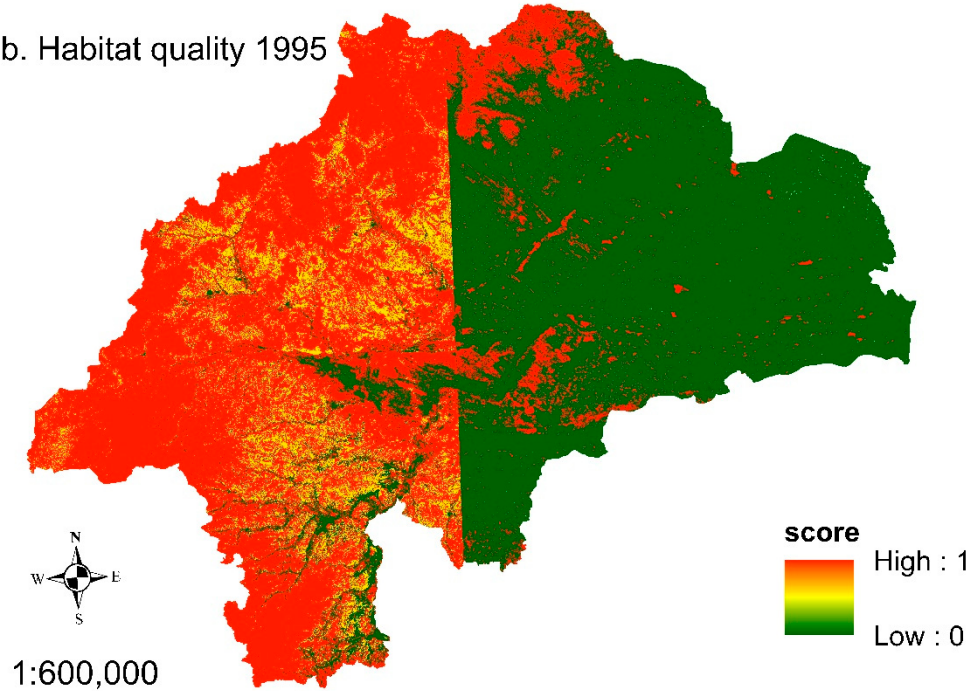

c. Habitat quality 2000

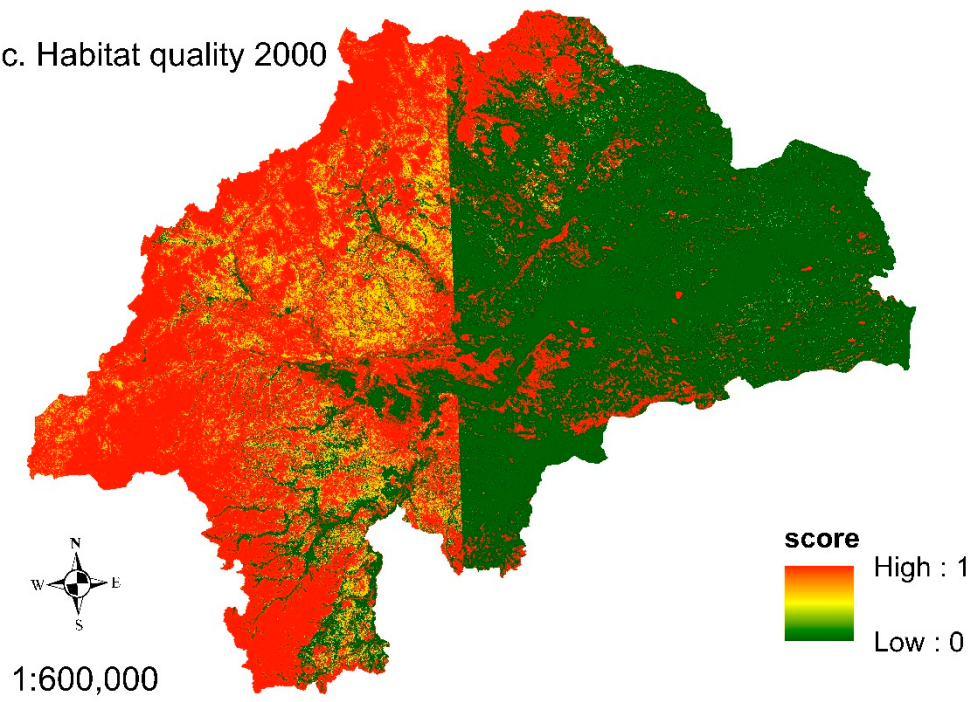

d. Habitat quality 2005

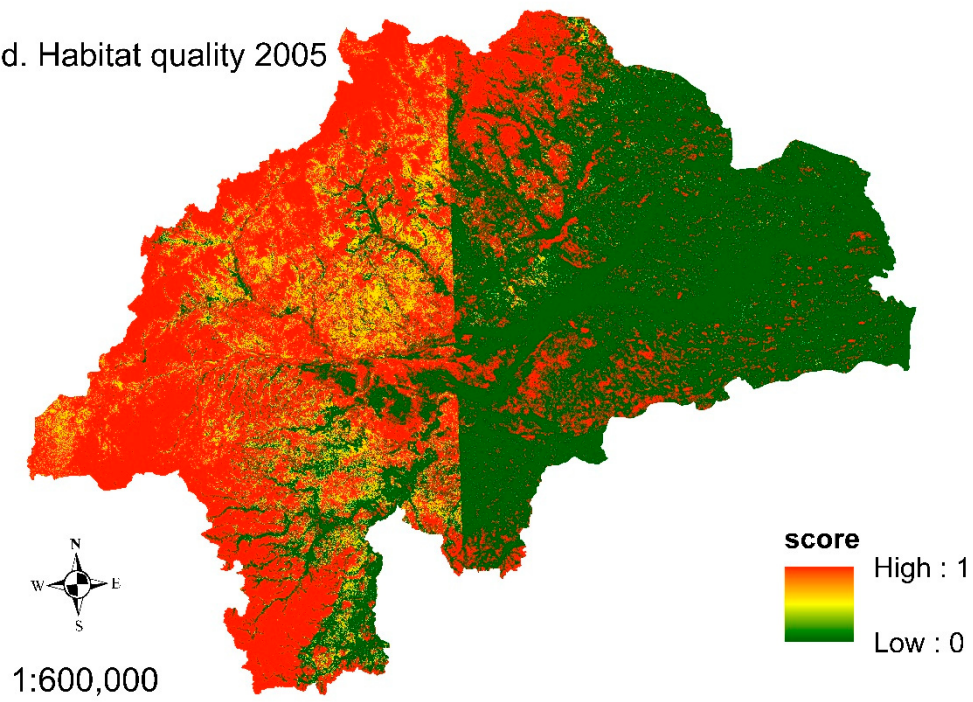

e. Habitat quality 2010

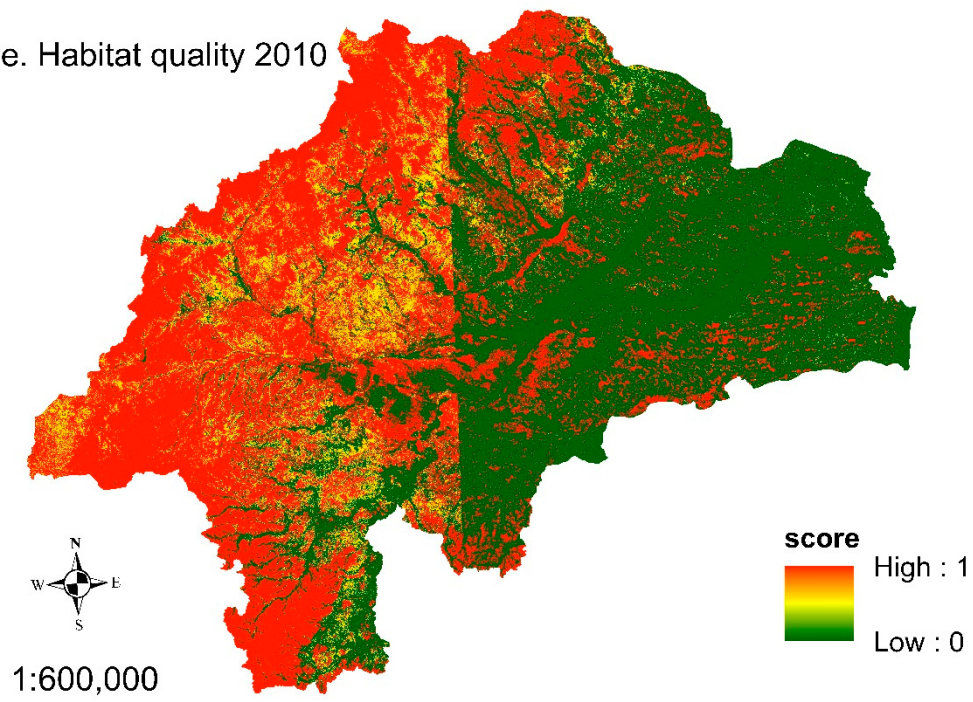

f. Habitat quality 2015

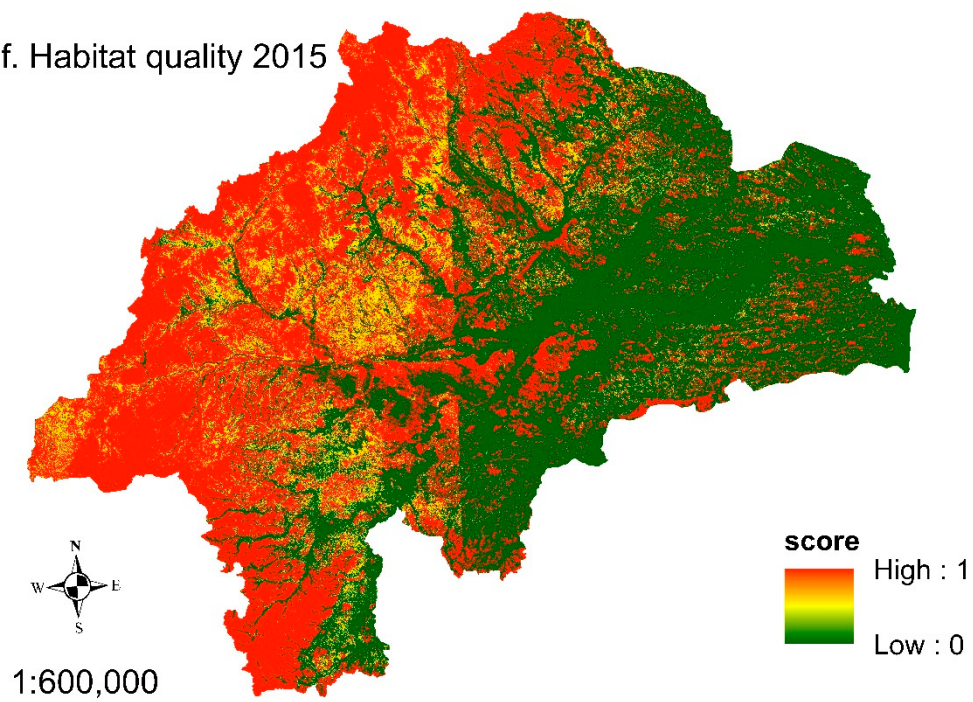

g. Habitat quality 2020

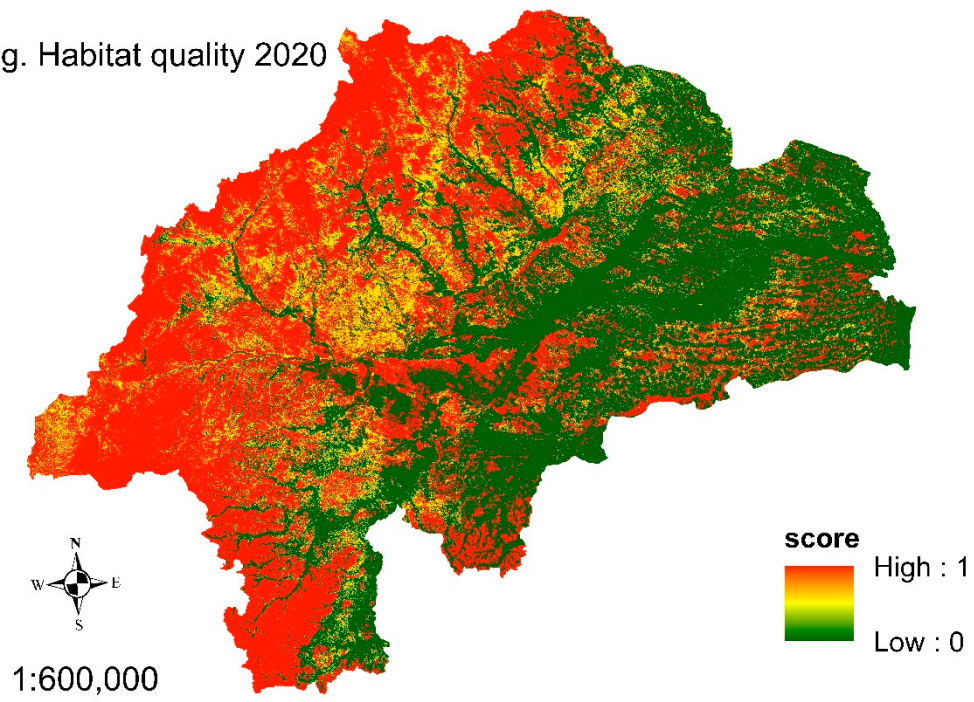

## S5. Spatial distributions of WR in six periods

a. WR 1990-1995

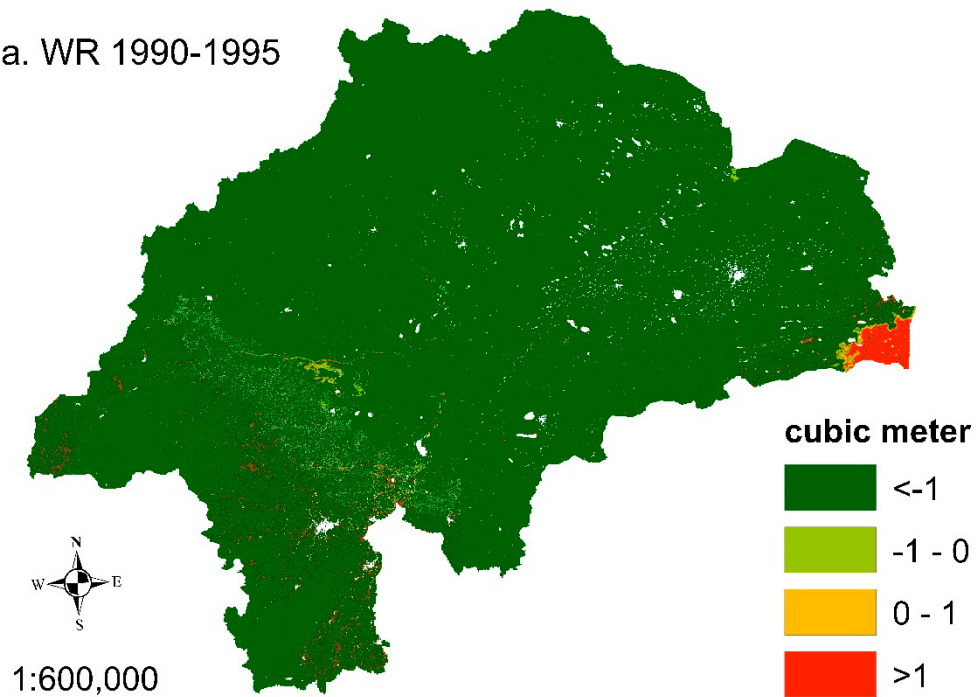

b. WR 1995-2000

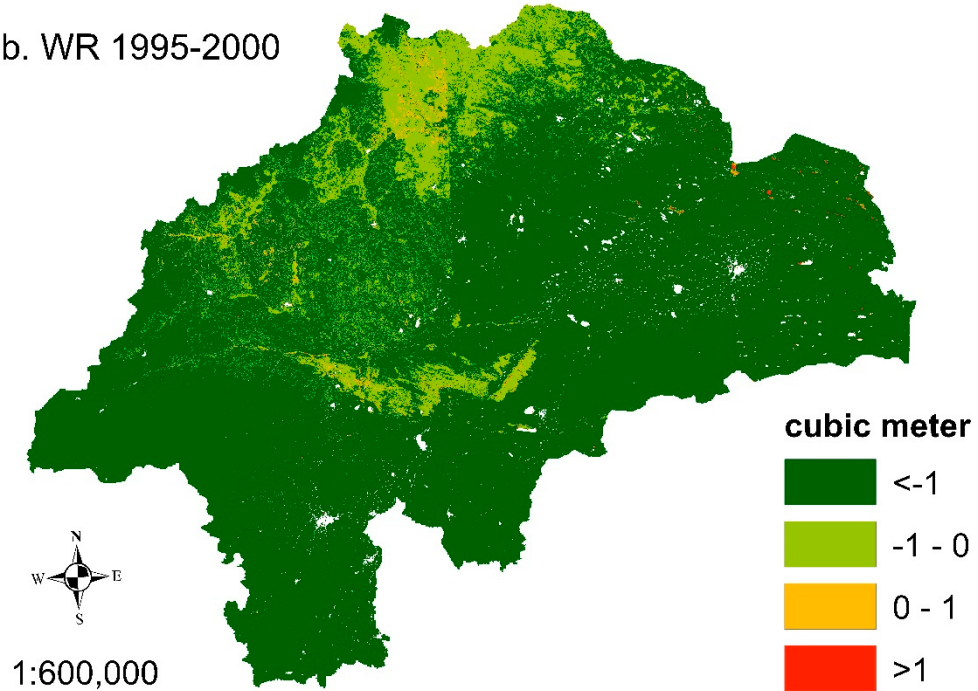

c. WR 2000-2005

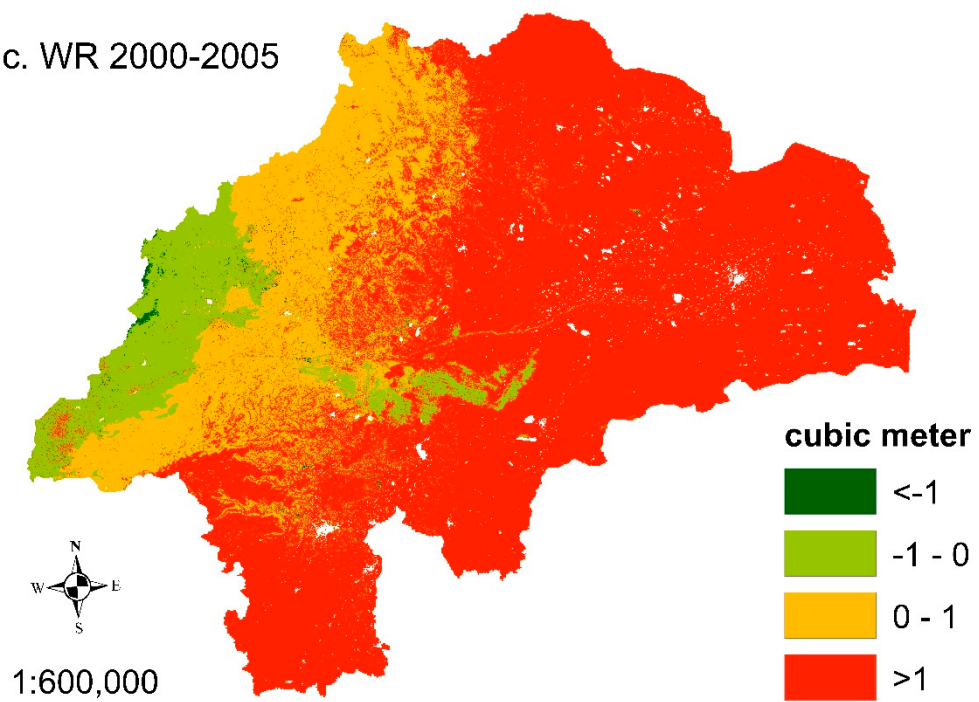

d. WR 2005-2010

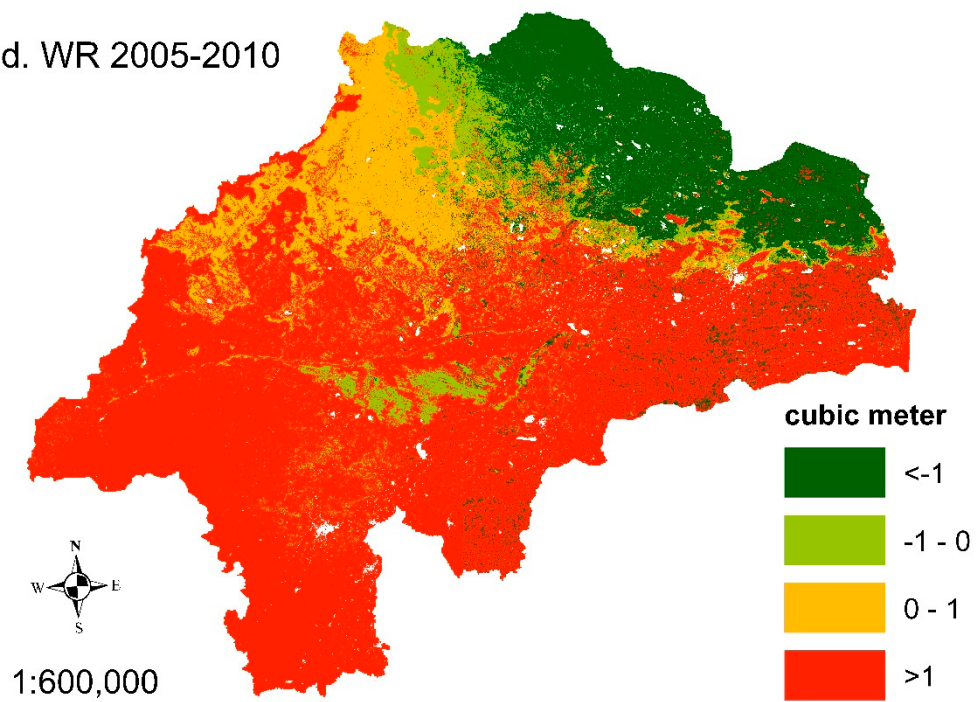

e. WR 2010-2015

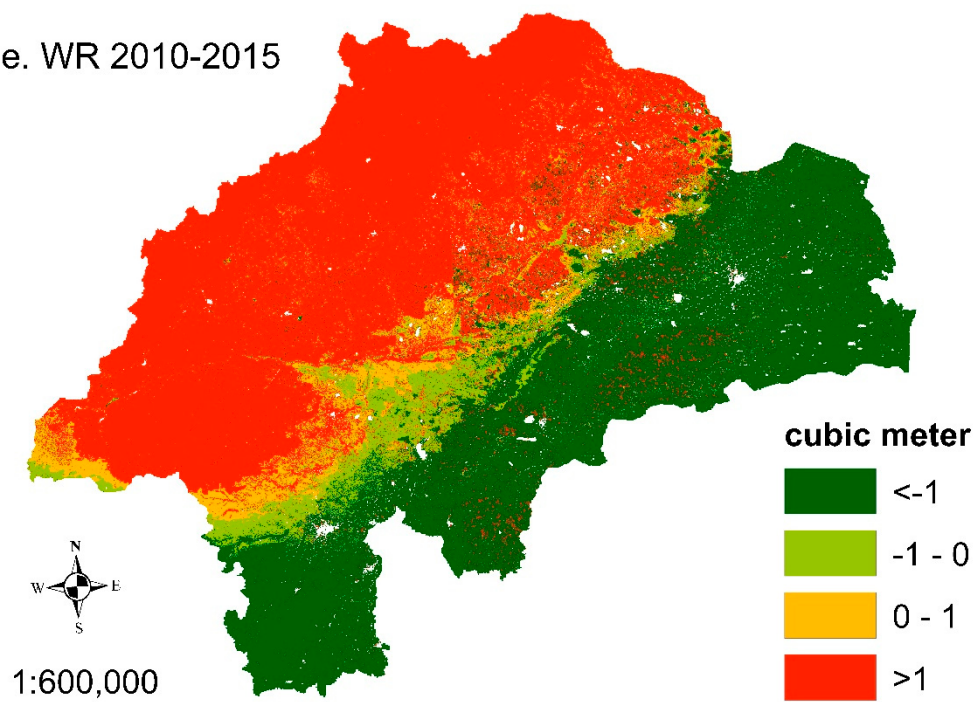

f. WR 2015-2020

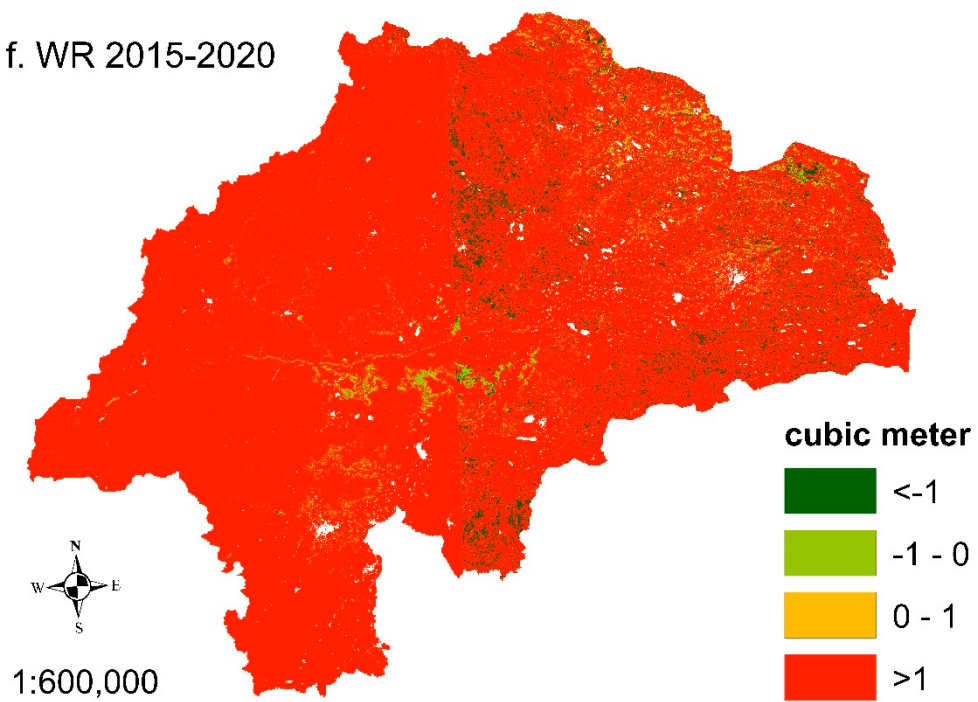

## S6. Spatial distributions of SC in six periods

a. SC 1990-1995

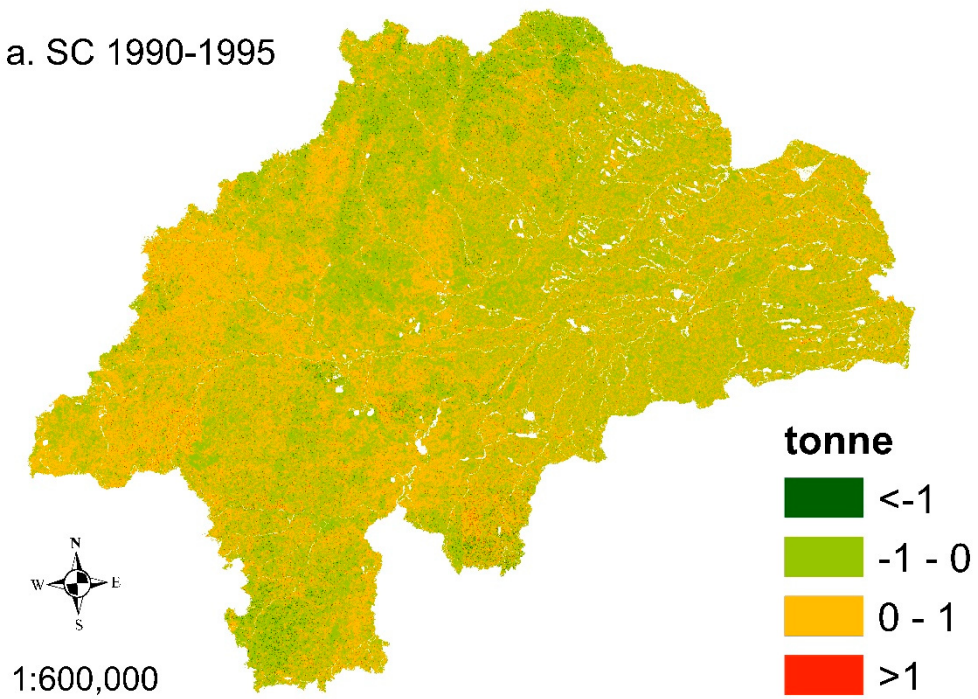

b. SC 1995-2000

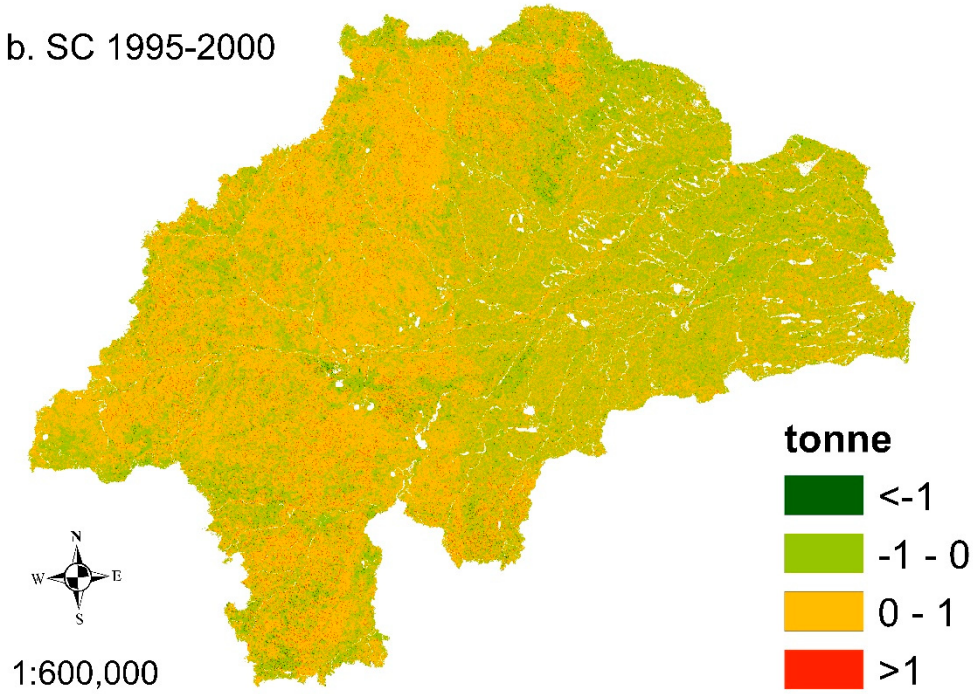

c. SC 2000-2005

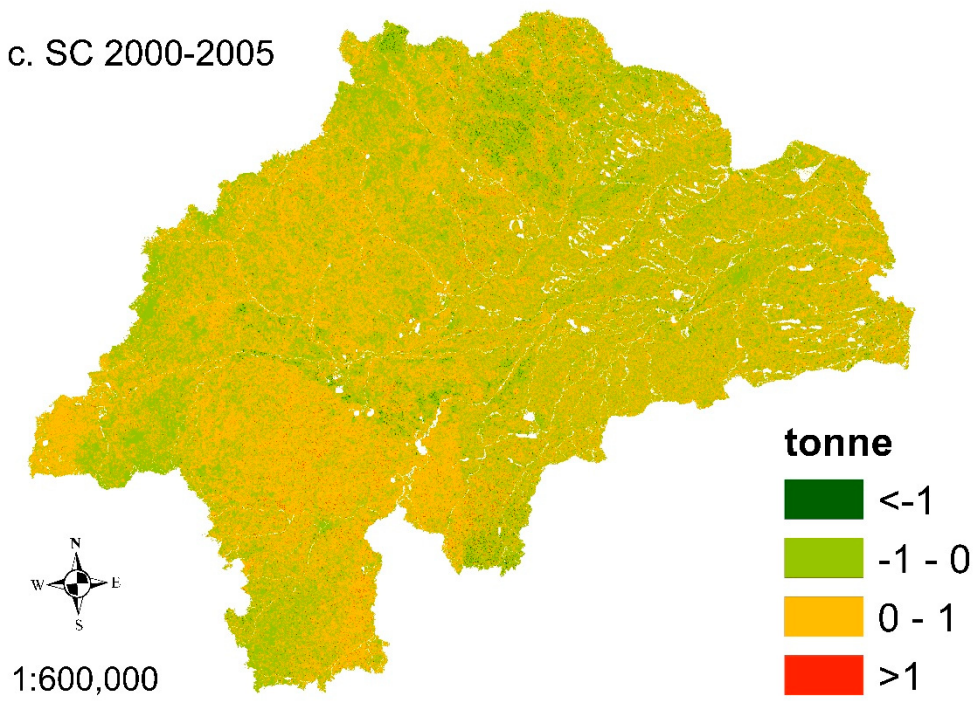

d. SC 2005-2010

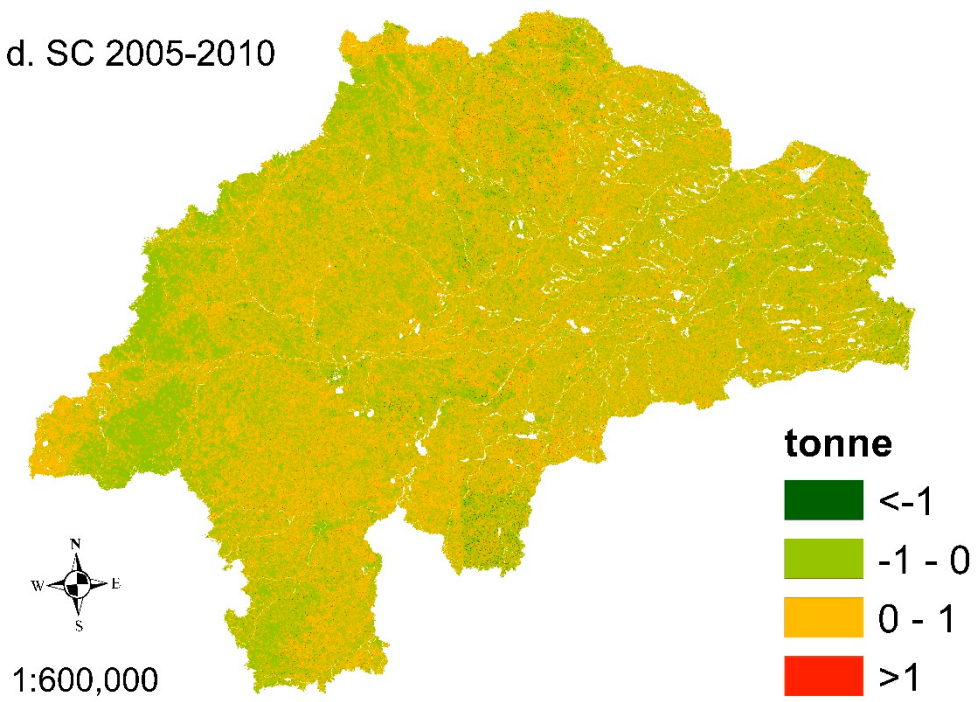

e. SC 2010-2015

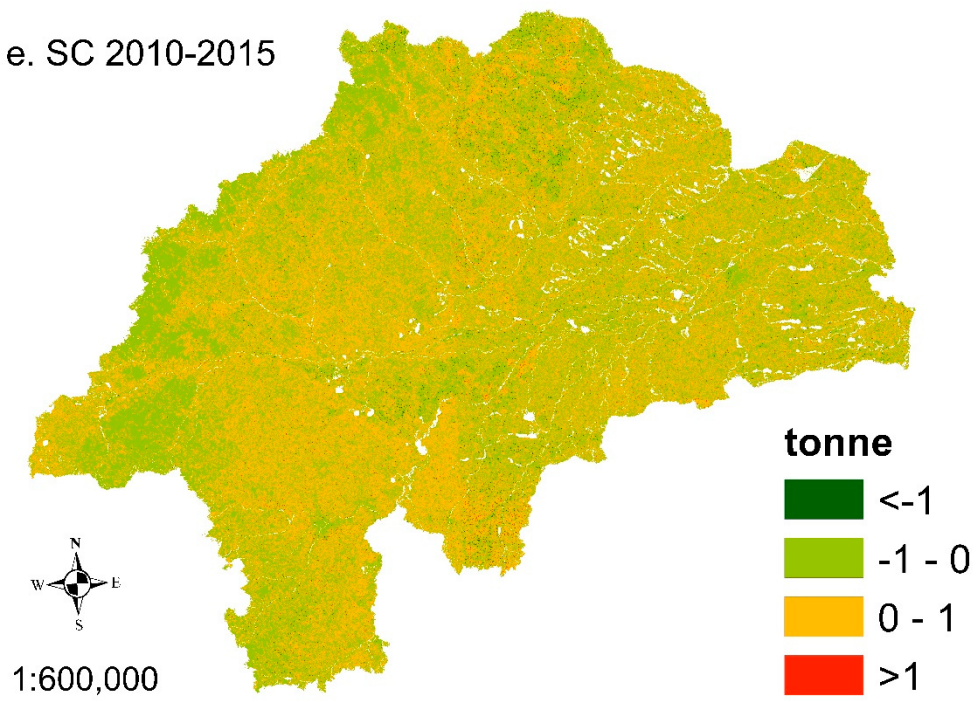

f. SC 2015-2020

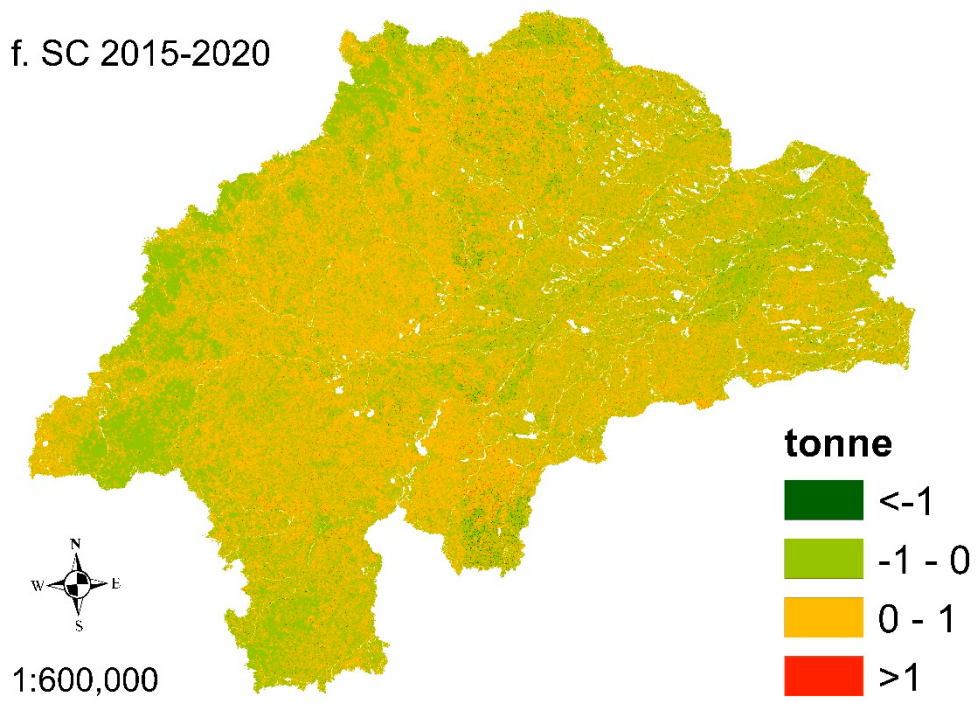

## S7. Spatial distributions of CS in six periods

a. CS 1990-1995

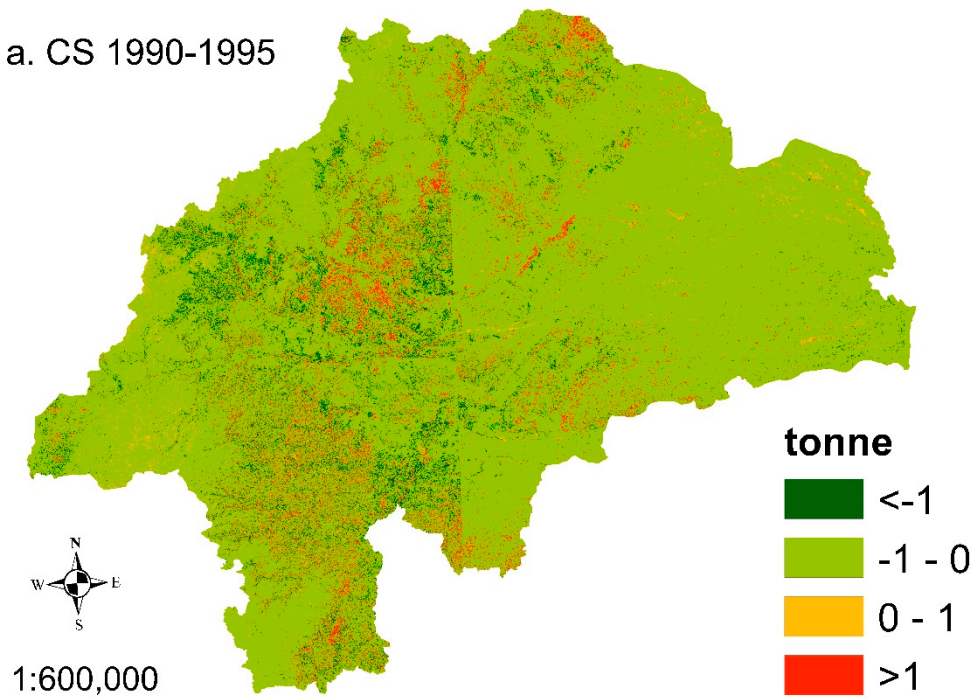

b. CS 1995-2000

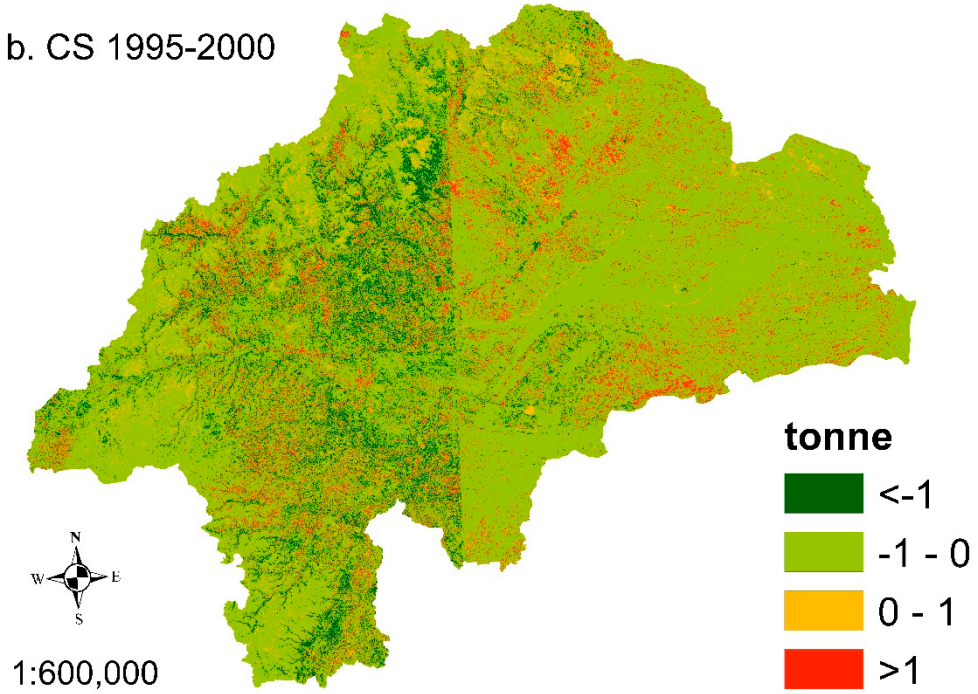

c. CS 2000-2005

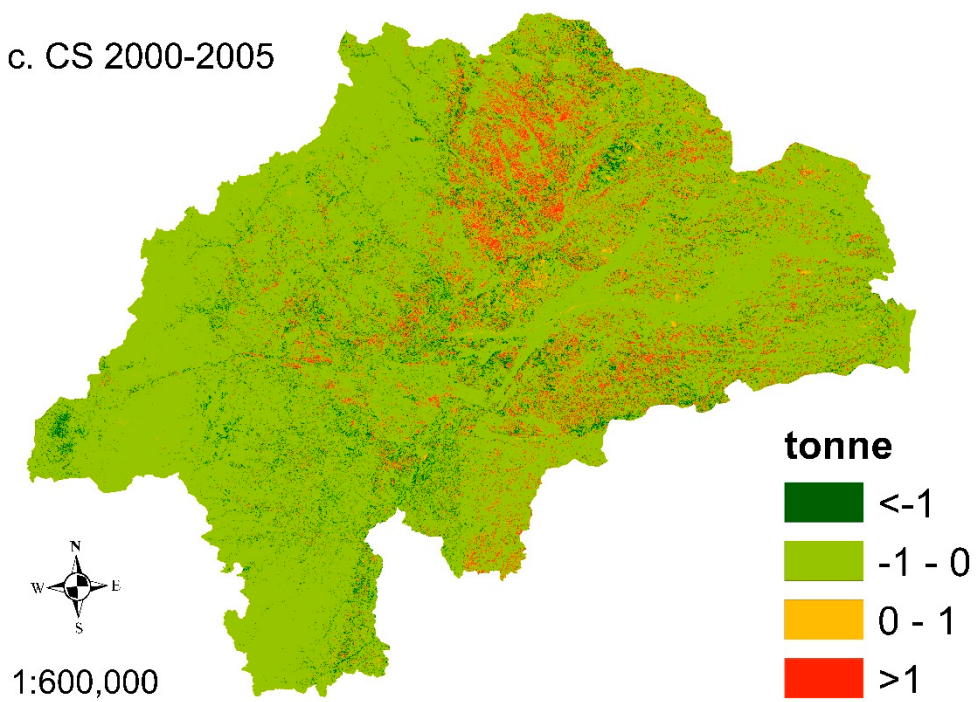

d. CS 2005-2010

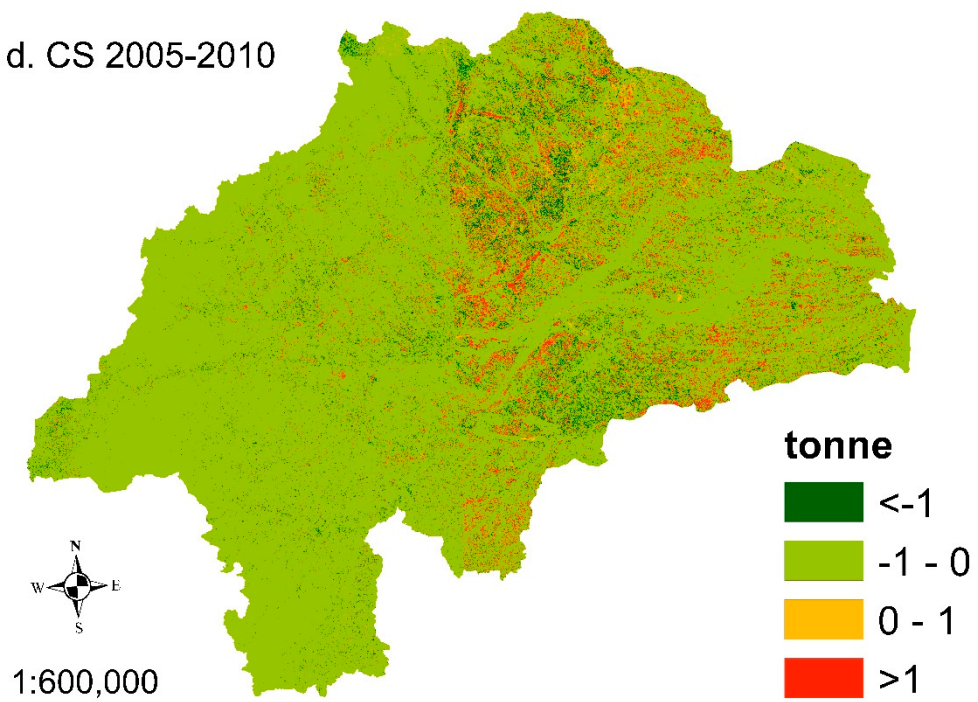

e. CS 2010-2015

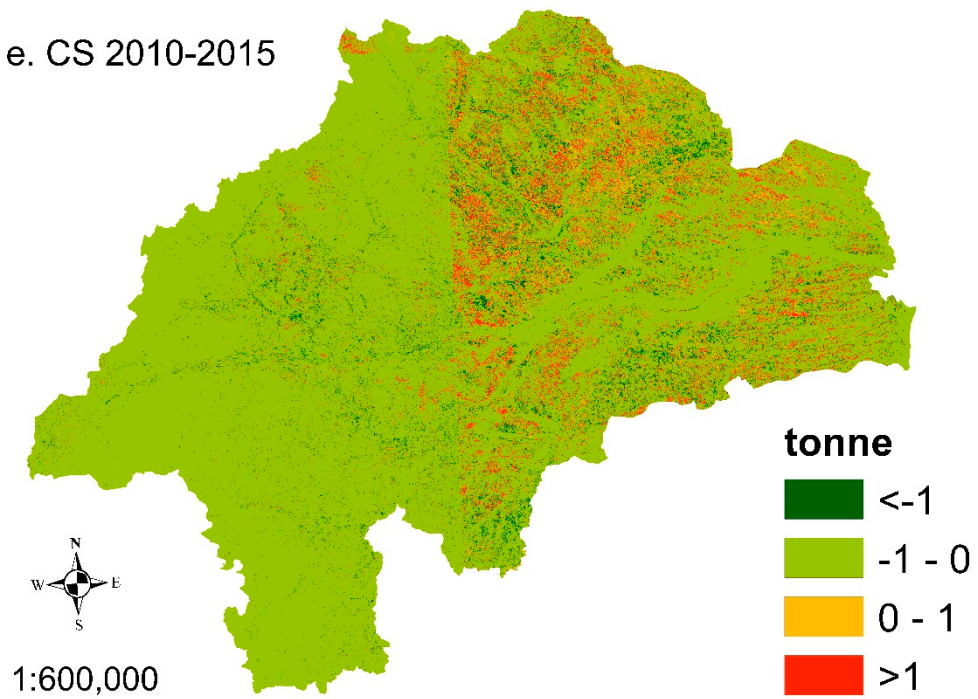

f. CS 2015-2020

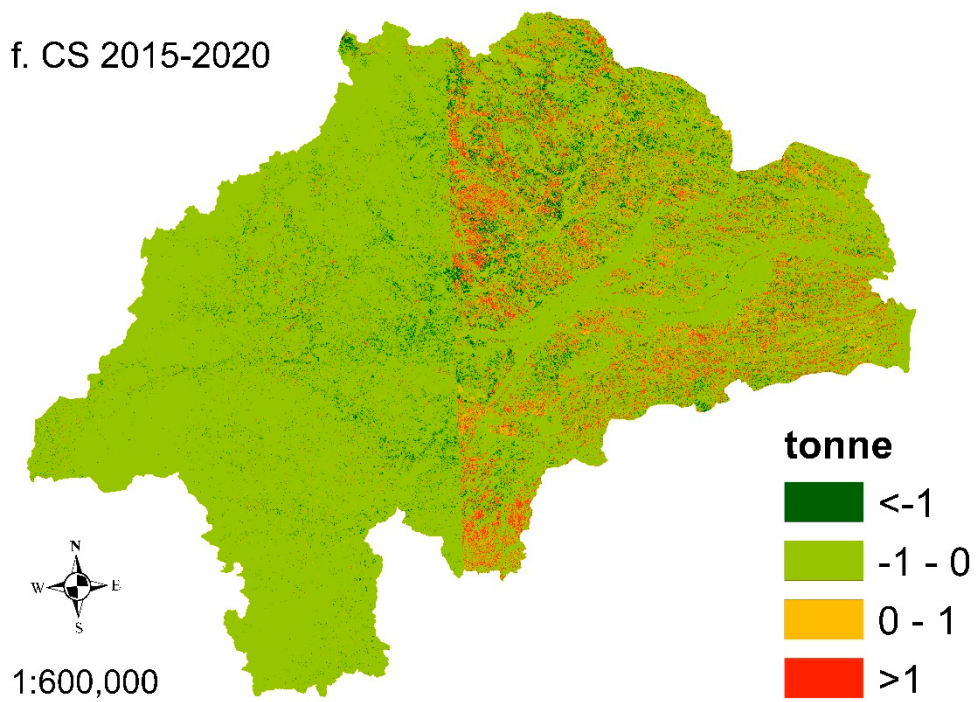

## S8. Spatial distributions of HI in six periods

a. HI 1990-1995

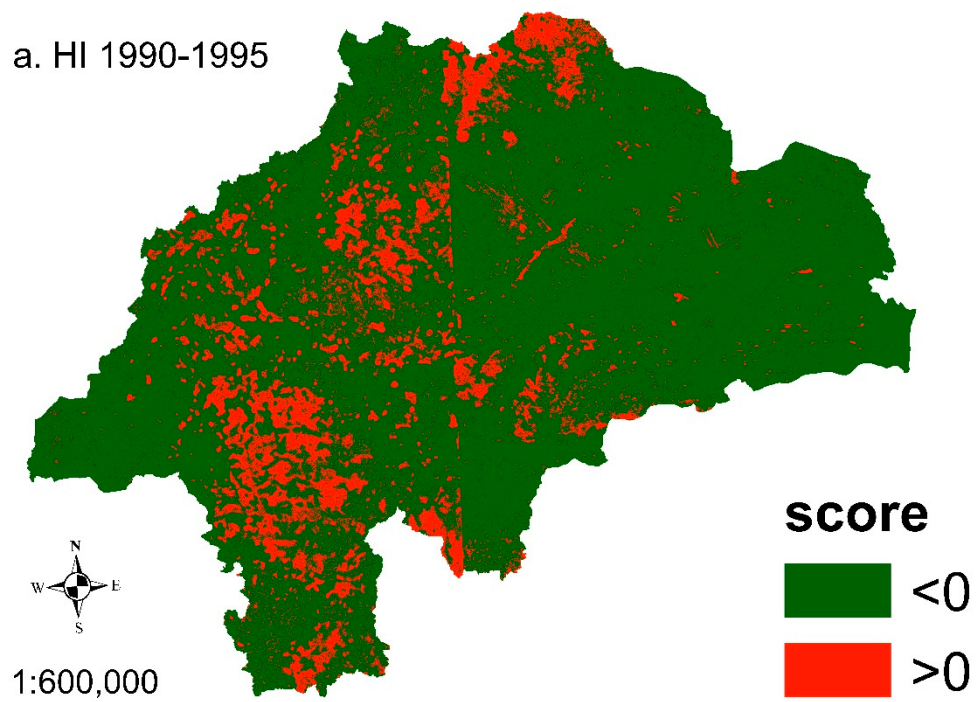

b. HI 1995-2000

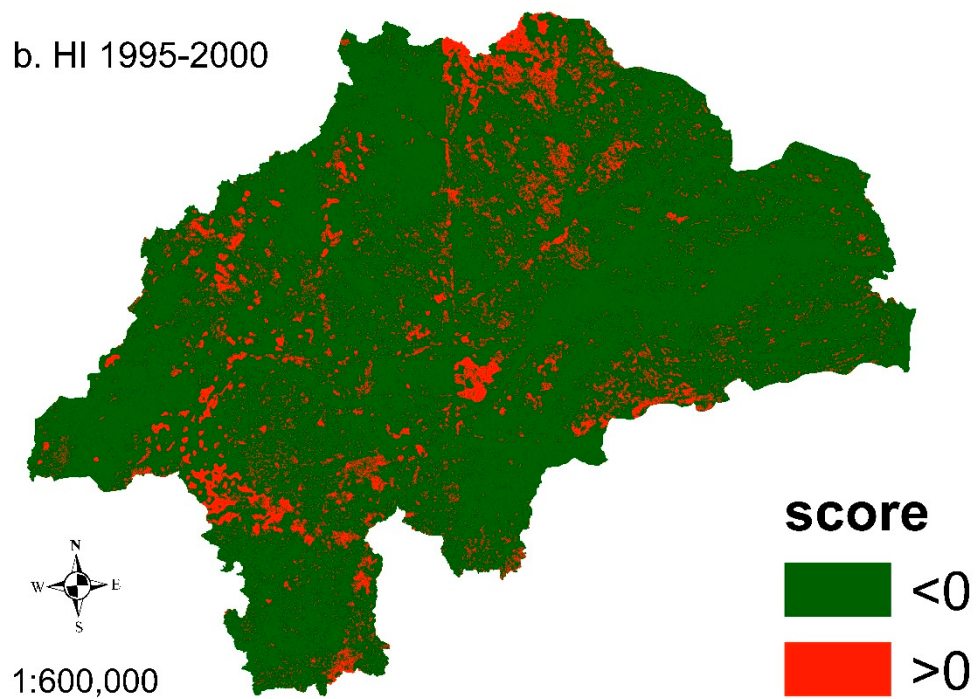

c. HI 2000-2005

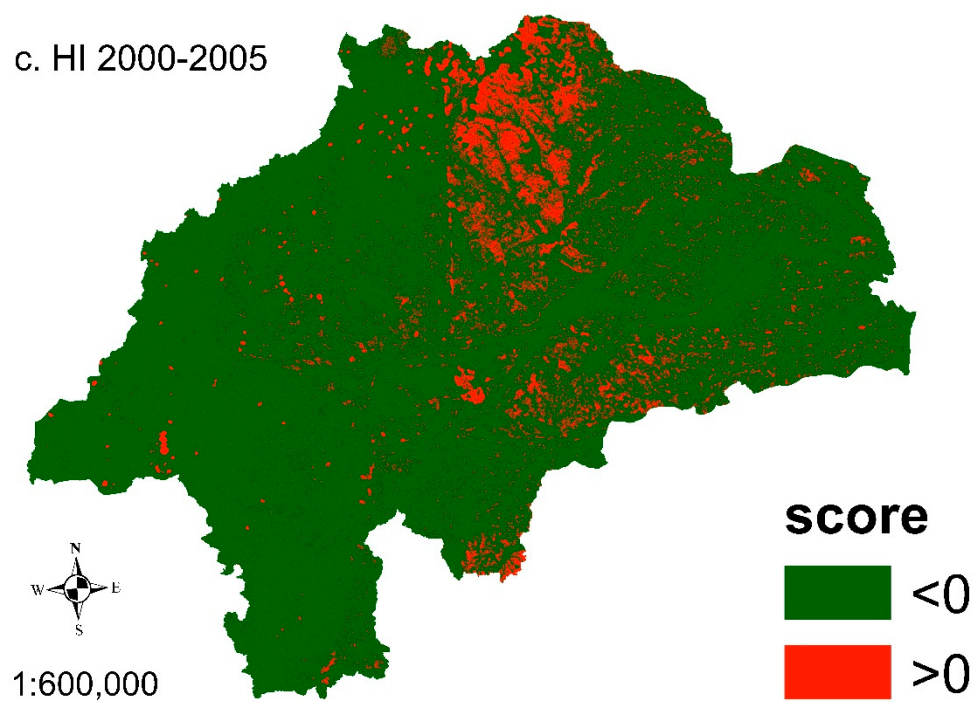

d. HI 2005-2010

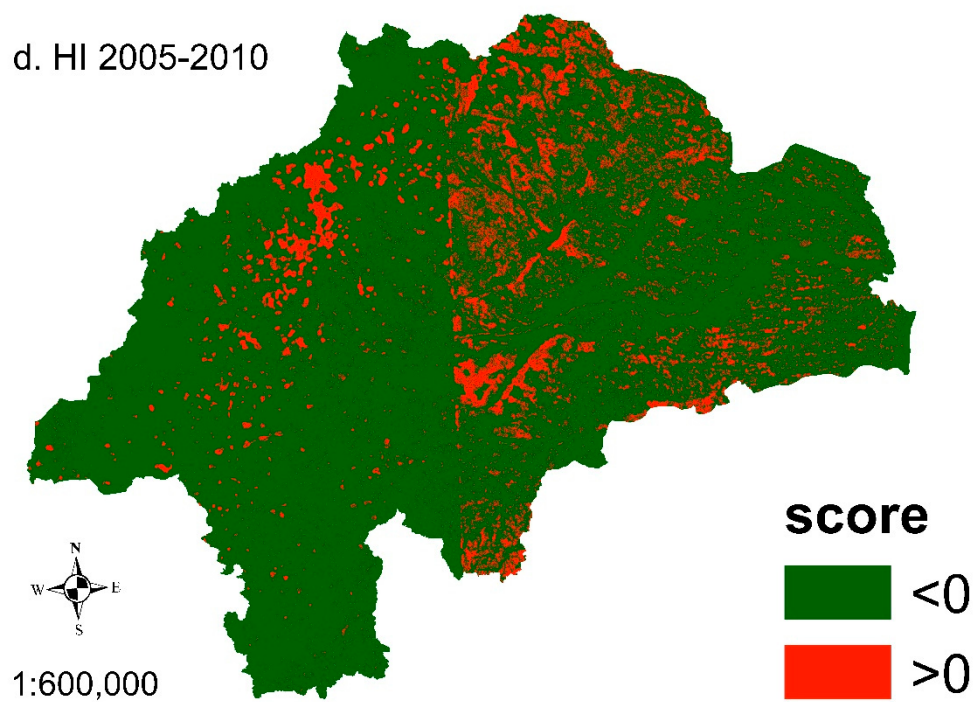

e. HI 2010-2015

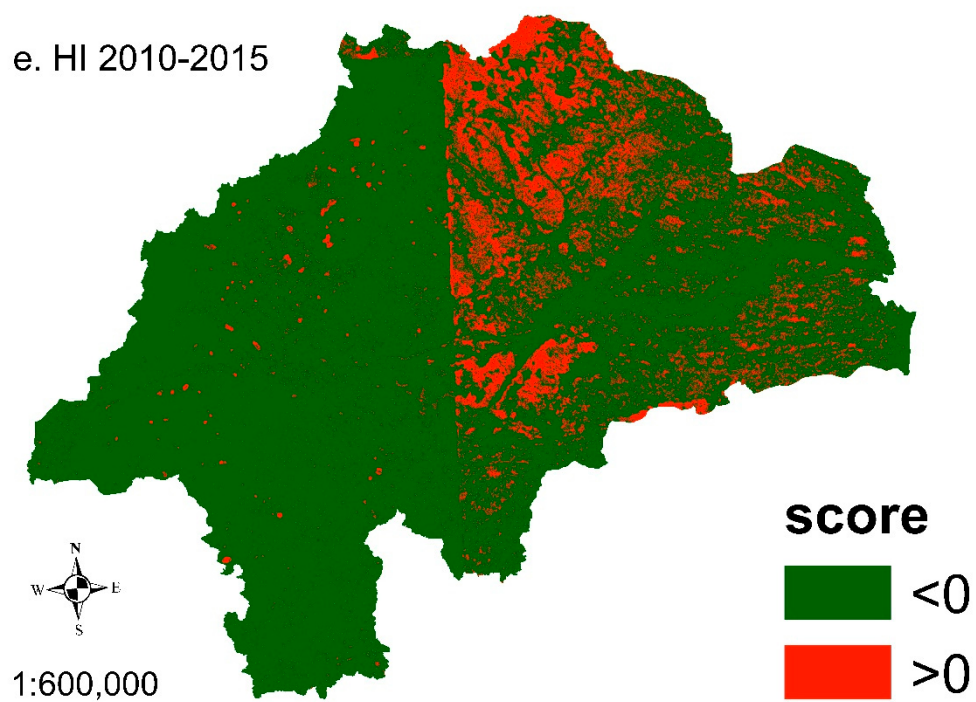

f. HI 2015-2020

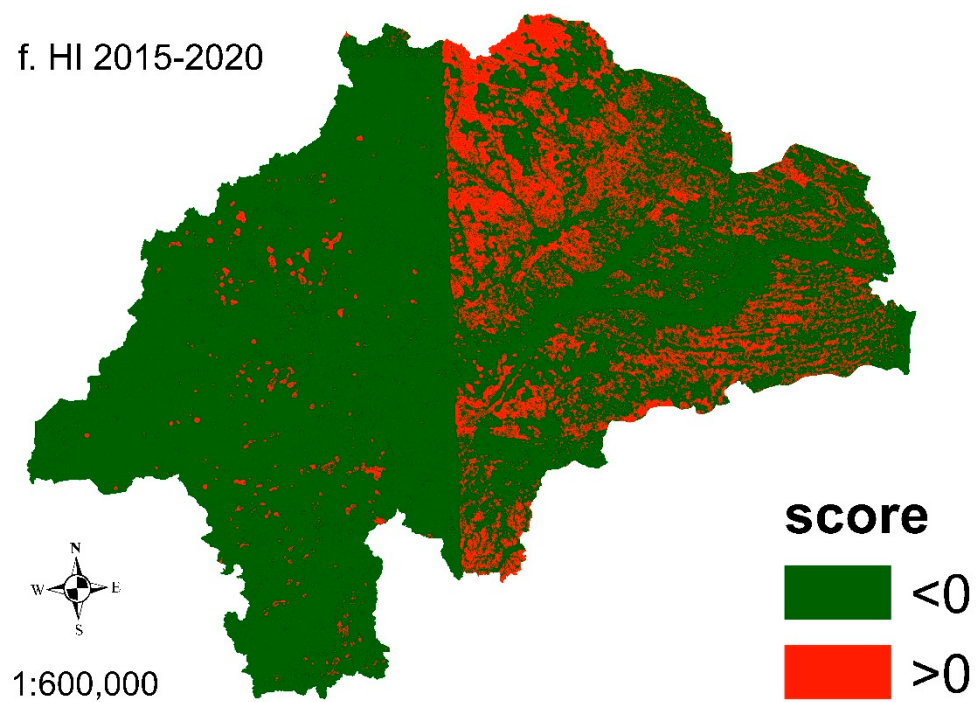

Supplement: s1 [file s1 › remotesensing-2131065-supplementary.pdf]
