# Supplementary material for: Assessing Temporal Trade-Offs of Ecosystem Services by Production Possibility Frontiers
Source: MDPI journal article supplement (doi:10.3390/rs15030749), 2023-01-28
Supplement: s1 [file s1]

Archive with 1 entries (1 files):
- remotesensing-2131065-supplementary.pdf
